# Supplementary material for: A pilot study of peripheral blood DNA methylation models as predictors of knee osteoarthritis radiographic progression: data from the Osteoarthritis Initiative (OAI)
Source: PubMed Central journal article supplement (PMC6856188; doi:10.1038/s41598-019-53298-9), 2019-11-14
Supplement: 41598_2019_53298_MOESM1_ESM.pdf [file 41598_2019_53298_MOESM1_ESM.pdf]

**Title:**

A pilot study of peripheral blood DNA methylation models as predictors of knee osteoarthritis radiographic progression: data from the Osteoarthritis Initiative (OAI).

**Authors:**

Christopher Dunn<sup>1,2</sup>

Michael C. Nevitt<sup>3</sup>

John A. Lynch<sup>3</sup>

Matlock A. Jeffries<sup>1,2</sup>

1. University of Oklahoma Health Sciences Center, Department of Internal Medicine, Division of Rheumatology, Immunology, and Allergy, Oklahoma City, OK
2. Oklahoma Medical Research Foundation, Arthritis and Clinical Immunology Program, Oklahoma City, OK
3. University of California San Francisco, San Francisco, CA

**Supplementary Information:**

Supplementary Figure 1: Model performance by number of CpG sites included during development.

Supplementary Table 1: Extended case and control characteristics

Supplementary Table 2: CpG sites chosen during model development

Supplementary Document 1: Case and control eligibility and selection process

# Supplementary Figure 1

## Model performance by number of CpG sites included during development

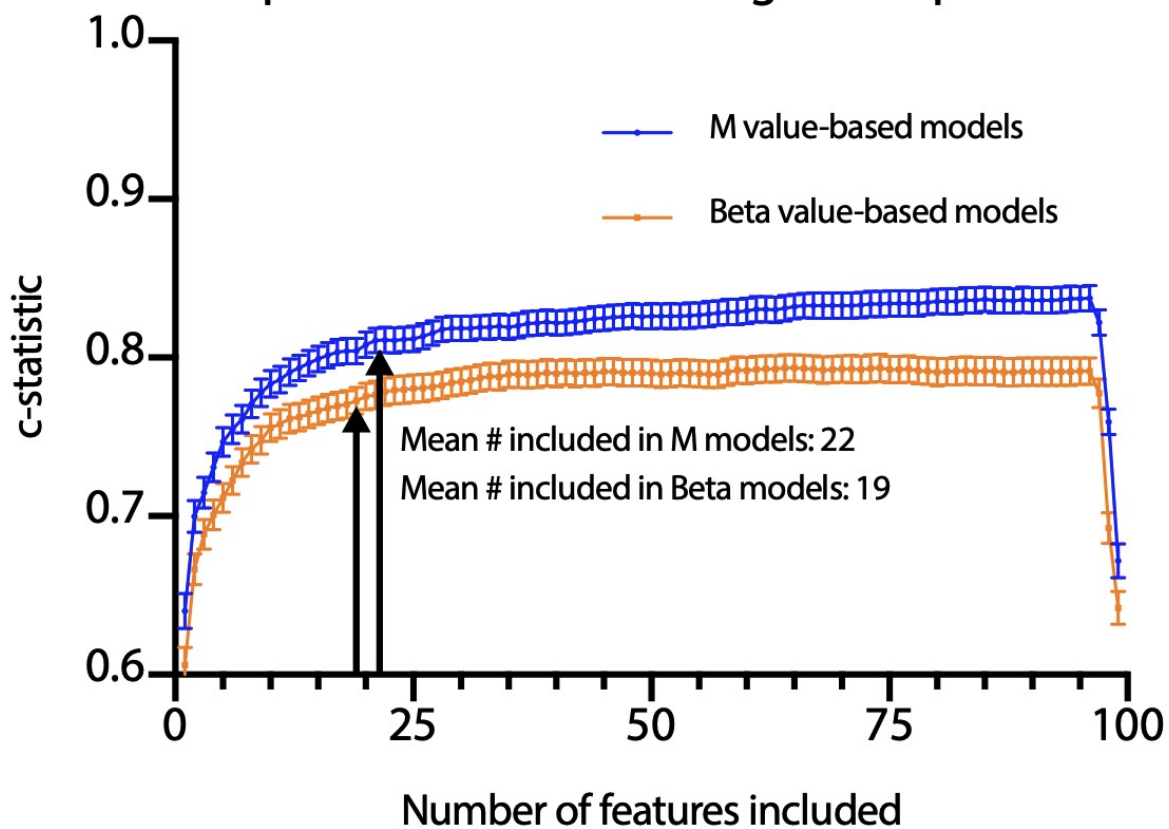

Supplementary Table 1: Extended case and control characteristics

| Group   | BMI Group | Age Group | BMI  | Age | Ethnicity           | Sex    | Smoker<br>(yes=1,<br>no=0) | NSAID user<br>(yes=1,<br>no=0) | Mean bilateral<br>baseline JSW (mm) | Mean bilateral baseline<br>Western Ontario and<br>McMasters Universities<br>Osteoarthritis Index<br>(WOMAC) pain score (0-<br>20 scale) | Baseline K/L<br>grade |
|---------|-----------|-----------|------|-----|---------------------|--------|----------------------------|--------------------------------|-------------------------------------|-----------------------------------------------------------------------------------------------------------------------------------------|-----------------------|
| Control | 20.0-29.9 | 45-49     | 27.2 | 46  | 2: African American | male   | 0                          | 1                              | 3.74                                | 2                                                                                                                                       | 2                     |
| Control | 30.0+     | 60-69     | 30   | 66  | 1: Caucasian        | female | 1                          | 0                              | 4.39                                | 3.5                                                                                                                                     | 2                     |
| Control | 20.0-29.9 | 70-79     | 28.3 | 70  | 1: Caucasian        | female | 0                          | 0                              | 4.53                                | 2.5                                                                                                                                     | 2                     |
| Control | 20.0-29.9 | 60-69     | 26.8 | 69  | 1: Caucasian        | female | 0                          | 0                              | 4.67                                | 0                                                                                                                                       | 2                     |
| Control | 20.0-29.9 | 70-79     | 24.5 | 70  | 1: Caucasian        | female | 1                          | 1                              | 4.37                                | 0                                                                                                                                       | 3                     |
| Control | 20.0-29.9 | 45-49     | 25.9 | 48  | 1: Caucasian        | male   | 0                          | 0                              | 4.57                                | 2.5                                                                                                                                     | 2                     |
| Control | 30.0+     | 60-69     | 33.2 | 66  | 1: Caucasian        | female | 1                          | 0                              | 4.41                                | 0                                                                                                                                       | 2                     |
| Control | 30.0+     | 60-69     | 33.4 | 60  | 1: Caucasian        | female | 0                          | 0                              | 3.46                                | 1.5                                                                                                                                     | 2                     |
| Control | 20.0-29.9 | 50-59     | 27.4 | 59  | 1: Caucasian        | male   | 1                          | 0                              | 5.87                                | 4.5                                                                                                                                     | 2                     |
| Case    | 20.0-29.9 | 60-69     | 29.5 | 65  | 2: African American | female | 1                          | 0                              | 2.49                                | 2.5                                                                                                                                     | 3                     |
| Control | 20.0-29.9 | 50-59     | 29.7 | 59  | 1: Caucasian        | female | 0                          | 0                              | 4.25                                | 1                                                                                                                                       | 3                     |
| Case    | 20.0-29.9 | 60-69     | 27.7 | 66  | 1: Caucasian        | male   | 1                          | 1                              | 4.03                                | 1.5                                                                                                                                     | 2                     |
| Control | 30.0+     | 50-59     | 33.3 | 58  | 1: Caucasian        | female | 1                          | 1                              | 4.94                                | 1                                                                                                                                       | 2                     |
| Case    | 30.0+     | 60-69     | 36.7 | 62  | 2: African American | female | 0                          | 0                              | 3.21                                | 8                                                                                                                                       | 3                     |
| Case    | 30.0+     | 50-59     | 34.2 | 50  | 2: African American | male   | 1                          | 1                              | 3.01                                | 2.5                                                                                                                                     | 3                     |
| Case    | 30.0+     | 45-49     | 38.7 | 48  | 1: Caucasian        | female | 0                          | 1                              | 5.62                                | 6.5                                                                                                                                     | 3                     |
| Control | 30.0+     | 45-49     | 34.5 | 46  | 1: Caucasian        | female | 1                          | 0                              | 4.68                                | 3                                                                                                                                       | 2                     |
| Case    | 30.0+     | 60-69     | 31.3 | 64  | 1: Caucasian        | male   | 1                          | 0                              | 4.12                                | 3                                                                                                                                       | 3                     |
| Control | 30.0+     | 50-59     | 37.5 | 57  | 1: Caucasian        | male   | 0                          | 0                              | 2.77                                | 0                                                                                                                                       | 3                     |
| Control | 30.0+     | 50-59     | 34   | 50  | 2: African American | female | 1                          | 1                              | 4.17                                | 9                                                                                                                                       | 2                     |
| Control | 30.0+     | 45-49     | 30.4 | 46  | 1: Caucasian        | male   | 0                          | 0                              | 4.05                                | 0.5                                                                                                                                     | 3                     |
| Control | 20.0-29.9 | 50-59     | 29.8 | 52  | 1: Caucasian        | male   | 1                          | 0                              | 3.59                                | 3.5                                                                                                                                     | 3                     |
| Case    | 20.0-29.9 | 45-49     | 27.6 | 46  | 1: Caucasian        | female | 1                          | 0                              | 5.26                                | 3.5                                                                                                                                     | 2                     |
| Control | 20.0-29.9 | 60-69     | 26.2 | 66  | 1: Caucasian        | male   | 1                          | 0                              | 3.98                                | 1                                                                                                                                       | 3                     |
| Case    | 30.0+     | 45-49     | 33.8 | 45  | 1: Caucasian        | male   | 0                          | 0                              | 3.93                                | 9.5                                                                                                                                     | 3                     |
| Control | 20.0-29.9 | 50-59     | 27.4 | 53  | 1: Caucasian        | male   | 0                          | 0                              | 3.95                                | 1                                                                                                                                       | 2                     |
| Control | 30.0+     | 45-49     | 32.3 | 48  | 1: Caucasian        | female | 0                          | 1                              | 5.45                                | 4                                                                                                                                       | 2                     |
| Control | 20.0-29.9 | 70-79     | 25.3 | 73  | 1: Caucasian        | female | 0                          | 0                              | 2.20                                | 4                                                                                                                                       | 3                     |
| Case    | 20.0-29.9 | 50-59     | 28.2 | 54  | 1: Caucasian        | male   | 0                          | 1                              | 4.40                                | 5                                                                                                                                       | 3                     |
| Control | 20.0-29.9 | 70-79     | 28.9 | 78  | 1: Caucasian        | female | 1                          | 0                              | 3.10                                | 3                                                                                                                                       | 2                     |
| Case    | 30.0+     | 70-79     | 30.1 | 77  | 1: Caucasian        | female | 1                          | 0                              | 2.80                                | 3                                                                                                                                       | 3                     |
| Control | 30.0+     | 70-79     | 32.6 | 74  | 1: Caucasian        | female | 1                          | 0                              | 2.93                                | 1                                                                                                                                       | 3                     |
| Case    | 30.0+     | 60-69     | 37.7 | 66  | 1: Caucasian        | female | 0                          | 1                              | 3.23                                | 5.5                                                                                                                                     | 2                     |
| Control | 20.0-29.9 | 50-59     | 28   | 52  | 1: Caucasian        | male   | 0                          | 1                              | 3.61                                | 1                                                                                                                                       | 2                     |
| Control | 20.0-29.9 | 50-59     | 29   | 51  | 1: Caucasian        | male   | 0                          | 0                              | 4.48                                | 6.5                                                                                                                                     | 2                     |
| Case    | 20.0-29.9 | 50-59     | 29.1 | 52  | 1: Caucasian        | male   | 1                          | 0                              | 4.03                                | 7                                                                                                                                       | 2                     |
| Control | 20.0-29.9 | 50-59     | 27.5 | 52  | 1: Caucasian        | female | 0                          | 0                              | 4.34                                | 3                                                                                                                                       | 2                     |
| Control | 30.0+     | 50-59     | 40.6 | 55  | 2: African American | male   | 1                          | 0                              | 3.78                                | 0                                                                                                                                       | 3                     |
| Case    | 30.0+     | 45-49     | 34.3 | 48  | 1: Caucasian        | female | 0                          | 0                              | 4.09                                | 10                                                                                                                                      | 3                     |
| Case    | 30.0+     | 50-59     | 31.1 | 57  | 2: African American | male   | 0                          | 0                              | 4.00                                | 6                                                                                                                                       | 2                     |
| Control | 30.0+     | 60-69     | 31.9 | 66  | 1: Caucasian        | male   | 1                          | 0                              | 5.52                                | 3                                                                                                                                       | 2                     |
| Control | 30.0+     | 60-69     | 36.2 | 66  | 1: Caucasian        | female | 1                          | 0                              | 3.34                                | 4                                                                                                                                       | 2                     |
| Case    | 20.0-29.9 | 50-59     | 28.8 | 59  | 1: Caucasian        | male   | 0                          | 1                              | 3.10                                | 3.5                                                                                                                                     | 3                     |
| Control | 30.0+     | 50-59     | 30.1 | 54  | 1: Caucasian        | male   | 0                          | 0                              | 5.01                                | 4.5                                                                                                                                     | 2                     |
| Control | 20.0-29.9 | 50-59     | 29.3 | 53  | 1: Caucasian        | male   | 0                          | 0                              | 3.01                                | 1                                                                                                                                       | 2                     |
| Control | 30.0+     | 50-59     | 32.4 | 54  | 2: African American | male   | 1                          | 0                              | 5.71                                | 12.5                                                                                                                                    | 2                     |
| Control | 30.0+     | 50-59     | 30   | 51  | 2: African American | female | 0                          | 0                              | 2.85                                | 5.5                                                                                                                                     | 2                     |
| Case    | 20.0-29.9 | 50-59     | 29.2 | 59  | 1: Caucasian        | male   | 1                          | 0                              | 1.87                                | 8.5                                                                                                                                     | 3                     |
| Case    | 30.0+     | 50-59     | 34.5 | 53  | 1: Caucasian        | male   | 0                          | 1                              | 4.23                                | 4                                                                                                                                       | 3                     |
| Case    | 30.0+     | 60-69     | 32   | 67  | 1: Caucasian        | male   | 0                          | 0                              | 4.66                                | 2                                                                                                                                       | 2                     |
| Control | 30.0+     | 50-59     | 30   | 51  | 1: Caucasian        | female | 1                          | 0                              | 4.01                                | 0.5                                                                                                                                     | 2                     |
| Control | 30.0+     | 60-69     | 30.6 | 62  | 1: Caucasian        | male   | 0                          | 0                              | 4.60                                | 1.5                                                                                                                                     | 3                     |
| Control | 20.0-29.9 | 60-69     | 29.2 | 67  | 1: Caucasian        | female | 1                          | 0                              | 4.39                                | 2                                                                                                                                       | 3                     |
| Case    | 30.0+     | 50-59     | 30.1 | 53  | 2: African American | female | 1                          | 0                              | 5.40                                | 9.5                                                                                                                                     | 2                     |
| Control | 20.0-29.9 | 60-69     | 28.8 | 63  | 1: Caucasian        | female | 1                          | 0                              | 2.50                                | 3.5                                                                                                                                     | 3                     |
| Case    | 30.0+     | 45-49     | 39.6 | 48  | 1: Caucasian        | male   | 0                          | 0                              | 3.92                                | 4.5                                                                                                                                     | 2                     |
| Case    | 30.0+     | 60-69     | 38.7 | 67  | 1: Caucasian        | male   | 0                          | 0                              | 2.29                                | 6                                                                                                                                       | 3                     |
| Case    | 20.0-29.9 | 60-69     | 26.5 | 66  | 1: Caucasian        | male   | 1                          | 0                              | 2.70                                | 7.5                                                                                                                                     | 3                     |
| Case    | 20.0-29.9 | 50-59     | 26.2 | 50  | 1: Caucasian        | male   | 0                          | 0                              | 4.56                                | 7.5                                                                                                                                     | 2                     |
| Control | 20.0-29.9 | 60-69     | 28.4 | 63  | 1: Caucasian        | female | 0                          | 1                              | 3.92                                | 0                                                                                                                                       | 2                     |
| Control | 20.0-29.9 | 50-59     | 25.2 | 59  | 1: Caucasian        | male   | 0                          | 0                              | 3.04                                | 5                                                                                                                                       | 3                     |
| Control | 20.0-29.9 | 70-79     | 28.8 | 71  | 1: Caucasian        | male   | 0                          | 0                              | 2.83                                | 0                                                                                                                                       | 3                     |
| Control | 30.0+     | 50-59     | 31.5 | 51  | 1: Caucasian        | male   | 1                          | 1                              | 4.78                                | 4.5                                                                                                                                     | 2                     |
| Case    | 20.0-29.9 | 70-79     | 25.9 | 74  | 1: Caucasian        | female | 0                          | 0                              | 3.62                                | 2                                                                                                                                       | 3                     |
| Case    | 20.0-29.9 | 50-59     | 26.5 | 52  | 1: Caucasian        | male   | 0                          | 0                              | 5.45                                | 4                                                                                                                                       | 2                     |
| Control | 20.0-29.9 | 50-59     | 27.1 | 53  | 1: Caucasian        | male   | 0                          | 0                              | 5.55                                | 1                                                                                                                                       | 2                     |
| Control | 30.0+     | 50-59     | 34.3 | 54  | 1: Caucasian        | female | 1                          | 0                              | 4.01                                | 4                                                                                                                                       | 3                     |
| Case    | 20.0-29.9 | 50-59     | 22.4 | 53  | 1: Caucasian        | male   | 1                          | 1                              | 3.17                                | 2                                                                                                                                       | 3                     |

|         |           |       |      |                        |        |   |   |      |       |   |
|---------|-----------|-------|------|------------------------|--------|---|---|------|-------|---|
| Case    | 20.0-29.9 | 70-79 | 28.2 | 79 1: Caucasian        | female | 1 | 0 | 3.56 | 6.5   | 3 |
| Case    | 20.0-29.9 | 60-69 | 28.8 | 67 1: Caucasian        | male   | 1 | 0 | 6.97 | 4.5   | 2 |
| Case    | 30.0+     | 60-69 | 33.3 | 62 1: Caucasian        | female | 1 | 1 | 4.10 | 4.5   | 3 |
| Case    | 30.0+     | 50-59 | 32   | 54 2: African American | male   | 1 | 0 | 3.81 | 4     | 3 |
| Case    | 20.0-29.9 | 50-59 | 29.7 | 50 1: Caucasian        | female | 0 | 0 | 4.01 | 3     | 2 |
| Case    | 30.0+     | 60-69 | 36   | 62 1: Caucasian        | male   | 1 | 1 | 2.01 | 3.5   | 3 |
| Control | 30.0+     | 60-69 | 30.4 | 65 1: Caucasian        | male   | 0 | 0 | 5.27 | 0.5   | 2 |
| Case    | 20.0-29.9 | 60-69 | 27.9 | 60 1: Caucasian        | female | 1 | 0 | 1.59 | 3     | 3 |
| Control | 20.0-29.9 | 60-69 | 28.6 | 65 1: Caucasian        | male   | 1 | 0 | 4.80 | 8.5   | 3 |
| Control | 20.0-29.9 | 60-69 | 29.3 | 69 2: African American | female | 0 | 1 | 5.27 | 5.5   | 2 |
| Case    | 20.0-29.9 | 50-59 | 28.8 | 59 1: Caucasian        | male   | 0 | 0 | 2.22 | 4.5   | 3 |
| Case    | 20.0-29.9 | 70-79 | 26.3 | 78 1: Caucasian        | male   | 0 | 0 | 1.49 | 5     | 3 |
| Case    | 20.0-29.9 | 60-69 | 26   | 66 1: Caucasian        | female | 0 | 0 | 3.99 | 1     | 2 |
| Control | 30.0+     | 60-69 | 34.9 | 65 1: Caucasian        | female | 0 | 1 | 4.03 | 1.5   | 2 |
| Case    | 30.0+     | 50-59 | 31.2 | 56 1: Caucasian        | female | 1 | 1 | 3.86 | 4.5   | 3 |
| Case    | 20.0-29.9 | 60-69 | 27.6 | 60 1: Caucasian        | male   | 1 | 0 | 4.33 | 4     | 2 |
| Case    | 20.0-29.9 | 60-69 | 28   | 64 1: Caucasian        | female | 0 | 0 | 4.39 | 0.5   | 2 |
| Case    | 20.0-29.9 | 60-69 | 25.2 | 69 1: Caucasian        | female | 0 | 0 | 2.78 | 2.5   | 3 |
| Case    | 30.0+     | 50-59 | 31.8 | 53 1: Caucasian        | female | 1 | 1 | 4.02 | 2.5   | 2 |
| Case    | 30.0+     | 60-69 | 31.3 | 67 1: Caucasian        | male   | 1 | 0 | 5.16 | 13    | 2 |
| Case    | 30.0+     | 50-59 | 37.9 | 50 1: Caucasian        | male   | 1 | 0 | 4.63 | 2.5   | 3 |
| Control | 20.0-29.9 | 50-59 | 25.9 | 54 1: Caucasian        | male   | 1 | 0 | 5.40 | 1.5   | 2 |
| Control | 30.0+     | 50-59 | 35.9 | 57 1: Caucasian        | female | 1 | 0 | 3.65 | 6     | 3 |
| Case    | 30.0+     | 60-69 | 30.3 | 63 1: Caucasian        | female | 0 | 0 | 3.96 | 4     | 2 |
| Case    | 20.0-29.9 | 50-59 | 25.6 | 58 1: Caucasian        | female | 0 | 0 | 2.65 | 4.5   | 3 |
| Case    | 30.0+     | 50-59 | 33.6 | 59 1: Caucasian        | male   | 1 | 1 | 2.99 | 0     | 3 |
| Control | 20.0-29.9 | 60-69 | 28.4 | 62 1: Caucasian        | female | 0 | 0 | 3.15 | 1.5   | 3 |
| Case    | 20.0-29.9 | 50-59 | 29.1 | 53 1: Caucasian        | male   | 0 | 0 | 5.25 | 1     | 2 |
| Case    | 30.0+     | 50-59 | 30.1 | 53 1: Caucasian        | female | 0 | 0 | 5.12 | 2     | 2 |
| Case    | 30.0+     | 50-59 | 30.6 | 53 1: Caucasian        | female | 0 | 0 | 2.95 | 5.5   | 3 |
| Control | 20.0-29.9 | 60-69 | 29   | 64 1: Caucasian        | female | 0 | 0 | 3.21 | 3     | 2 |
| Case    | 20.0-29.9 | 45-49 | 29.5 | 47 2: African American | male   | 0 | 0 | 6.22 | 2     | 2 |
| Case    | 30.0+     | 60-69 | 38.7 | 66 1: Caucasian        | male   | 1 | 0 | 3.12 | 5     | 3 |
| Control | 30.0+     | 60-69 | 44.2 | 64 2: African American | female | 0 | 0 | 3.20 | 12.5  | 2 |
| Control | 30.0+     | 45-49 | 41.1 | 49 1: Caucasian        | female | 0 | 0 | 4.62 | 11.15 | 2 |
| Case    | 30.0+     | 60-69 | 30.4 | 66 1: Caucasian        | female | 1 | 0 | 5.14 | 2     | 2 |
| Control | 20.0-29.9 | 70-79 | 28.3 | 77 1: Caucasian        | female | 1 | 0 | 2.28 | 3     | 3 |
| Case    | 20.0-29.9 | 50-59 | 25.3 | 58 1: Caucasian        | male   | 0 | 0 | 5.38 | 0     | 2 |
| Control | 20.0-29.9 | 60-69 | 29.4 | 63 1: Caucasian        | female | 0 | 0 | 3.76 | 5     | 3 |
| Control | 30.0+     | 50-59 | 38.3 | 56 1: Caucasian        | female | 1 | 0 | 5.41 | 2     | 2 |
| Control | 30.0+     | 60-69 | 33.1 | 69 1: Caucasian        | female | 0 | 0 | 3.66 | 3.5   | 3 |
| Case    | 20.0-29.9 | 70-79 | 26.6 | 70 1: Caucasian        | female | 0 | 1 | 2.69 | 8     | 3 |
| Control | 20.0-29.9 | 60-69 | 27.9 | 68 1: Caucasian        | female | 0 | 0 | 3.25 | 10    | 3 |
| Case    | 20.0-29.9 | 70-79 | 23.9 | 70 1: Caucasian        | female | 0 | 0 | 3.38 | 6.5   | 2 |
| Case    | 20.0-29.9 | 70-79 | 29.1 | 70 1: Caucasian        | female | 0 | 1 | 3.95 | 2.5   | 3 |
| Control | 30.0+     | 60-69 | 38.2 | 64 1: Caucasian        | female | 0 | 0 | 3.95 | 8     | 3 |
| Case    | 20.0-29.9 | 60-69 | 29.2 | 69 1: Caucasian        | male   | 1 | 1 | 4.44 | 3     | 3 |
| Case    | 30.0+     | 50-59 | 35.1 | 50 1: Caucasian        | female | 1 | 1 | 4.01 | 0.5   | 2 |

Supplementary Table 2: CpG sites chosen during model development

| TargetID   | Beta count | M counts | GENOME_ID | CHR | MAPINFO | UCSC_REFGENE_NAME                    | UCSC_REFGENE_ACCESSION              | UCSC_REFGENE_GROUP     | UCSC_CPG_RELATION_TO_UCSC_CPG_ISLAND |
|------------|------------|----------|-----------|-----|---------|--------------------------------------|-------------------------------------|------------------------|--------------------------------------|
| cg00002464 |            |          | 1         | 37  | 8       | 1.2E+08 NOV                          | NM_002514                           | TSS200                 | chr8:12042Island                     |
| cg00027745 |            |          | 2         | 37  | 7       | 1452678                              |                                     |                        | chr7:14524Island                     |
| cg00089154 | 1          |          |           | 37  | 16      | 57352732                             |                                     |                        |                                      |
| cg00105102 | 2          |          |           | 37  | 1       | 1.56E+08 PAQR6;PAQR6                 | NM_024897;NM_198406                 | 5'UTR;5'UTR            | chr1:15621S_Shore                    |
| cg00105102 |            | 2        |           | 37  | 1       | 1.56E+08 PAQR6;PAQR6                 | NM_024897;NM_198406                 | 5'UTR;5'UTR            | chr1:15621S_Shore                    |
| cg00107890 | 1          |          |           | 37  | 15      | 71492746 THSD4                       | NM_024817                           | Body                   |                                      |
| cg00125544 | 1          |          |           | 37  | 2       | 2.37E+08 AGAP1;AGAP1                 | NM_014914;NM_001037131              | Body;Body              | chr2:23686N_Shore                    |
| cg00142933 | 1          |          |           | 37  | 2       | 1.28E+08 LIMS2;LIMS2;LIMS2;LIMS2     | NM_001136037;NM_017980;NM_001136037 | Body;Body;Body;5'UTR   | chr2:12842N_Shore                    |
| cg00142933 |            | 8        |           | 37  | 2       | 1.28E+08 LIMS2;LIMS2;LIMS2;LIMS2     | NM_001136037;NM_017980;NM_001136037 | Body;Body;Body;5'UTR   | chr2:12842N_Shore                    |
| cg00143249 | 5          |          |           | 37  | 7       | 1.57E+08 MNX1;MNX1                   | NM_001165255;NM_005515              | Body;Body              | chr7:15679Island                     |
| cg00143249 |            | 1        |           | 37  | 7       | 1.57E+08 MNX1;MNX1                   | NM_001165255;NM_005515              | Body;Body              | chr7:15679Island                     |
| cg00152637 |            | 1        |           | 37  | 6       | 28104690                             |                                     |                        | chr6:28104N_Shore                    |
| cg00180559 | 1          |          |           | 37  | 1       | 2.33E+08 KIAA1804                    | NM_032435                           | Body                   | chr1:23349N_Shore                    |
| cg00192026 | 1          |          |           | 37  | 4       | 1.74E+08                             |                                     |                        |                                      |
| cg00278028 | 3          |          |           | 37  | 22      | 28196834 MN1;MN1                     | NM_002430;NM_002430                 | 5'UTR;1stExon          | chr22:2819Island                     |
| cg00290605 | 1          |          |           | 37  | 22      | 32366707                             |                                     |                        | chr22:3236Island                     |
| cg00308618 |            | 1        |           | 37  | 2       | 1.53E+08 CACNB4;CACNB4;CACNB4;CACNB4 | NM_000726;NM_001145798;NM_001145798 | Body;Body;TSS1500;Body |                                      |
| cg00335286 | 2          |          |           | 37  | 18      | 13916355 MC2R                        | NM_000529                           | TSS1500                |                                      |
| cg00336071 | 1          |          |           | 37  | 15      | 63449943 RPS27L                      | NM_015920                           | TSS1500                | chr15:6344S_Shore                    |
| cg00355514 | 1          |          |           | 37  | 13      | 24914782                             |                                     |                        | chr13:2491Island                     |
| cg00386663 |            | 1        |           | 37  | 16      | 692659 FAM195A                       | NM_138418                           | Body                   | chr16:6915Island                     |
| cg00388154 | 1          |          |           | 37  | 15      | 68498857 CALML4;CALML4               | NM_001031733;NM_033429              | TSS1500;TSS1500        |                                      |
| cg00401433 | 1          |          |           | 37  | 8       | 1.07E+08 ZFPM2                       | NM_012082                           | Body                   |                                      |
| cg00409636 |            | 1        |           | 37  | 2       | 75720541 FAM176A;FAM176A             | NM_001135032;NM_032181              | Body;Body              |                                      |
| cg00466544 | 1          |          |           | 37  | 14      | 57046243 C14orf101                   | NM_017799                           | TSS1500                | chr14:5704N_Shore                    |
| cg00491335 |            | 1        |           | 37  | 2       | 2.25E+08                             |                                     |                        | chr2:22470S_Shelf                    |
| cg00496805 |            | 1        |           | 37  | 19      | 57901154 ZNF548                      | NM_152909                           | TSS200                 | chr19:5790Island                     |
| cg00497251 | 1          |          |           | 37  | 2       | 2.42E+08 RNPEPL1                     | NM_018226                           | 5'UTR                  | chr2:24150S_Shore                    |
| cg00510552 |            | 2        |           | 37  | 16      | 4511987 NMRAL1                       | NM_020677                           | Body                   |                                      |
| cg00551143 |            | 1        |           | 37  | 7       | 28998860 TRIL                        | NM_014817                           | TSS1500                | chr7:28995S_Shore                    |
| cg00562641 | 1          |          |           | 37  | 5       | 68789255 OCLN                        | NM_002538                           | 5'UTR                  | chr5:68788Island                     |
| cg00572243 | 1          |          |           | 37  | 8       | 28458806                             |                                     |                        |                                      |
| cg00587472 |            | 1        |           | 37  | 2       | 6952860                              |                                     |                        |                                      |
| cg00607154 | 1          |          |           | 37  | 5       | 6754116 POLS                         | NM_006999                           | Body                   | chr5:67551N_Shore                    |
| cg00618507 | 1          |          |           | 37  | 7       | 1.02E+08 ORAI2;ORAI2                 | NM_032831;NM_001126340              | 3'UTR;3'UTR            | chr7:10209N_Shore                    |
| cg00704844 | 1          |          |           | 37  | 6       | 32821621 PSMB9;TAP1;PSMB9;TAP1       | NM_002800;NM_000593;NM_148954       | TSS1500;5'UTR;TSS1500  | chr6:32820Island                     |
| cg00704844 |            | 1        |           | 37  | 6       | 32821621 PSMB9;TAP1;PSMB9;TAP1       | NM_002800;NM_000593;NM_148954       | TSS1500;5'UTR;TSS1500  | chr6:32820Island                     |
| cg00708678 |            | 1        |           | 37  | 10      | 91294839 SLC16A12                    | NM_213606                           | 5'UTR                  | chr10:9129N_Shore                    |
| cg00712762 | 2          |          |           | 37  | 1       | 36351470 EIF2C1                      | NM_012199                           | Body                   | chr1:36348S_Shore                    |
| cg00796164 |            | 1        |           | 37  | 19      | 57654968 ZIM3                        | NM_052882                           | 5'UTR                  |                                      |
| cg00819788 | 1          |          |           | 37  | 17      | 7308579 C17orf61                     | NM_152766                           | TSS1500                | chr17:7307Island                     |
| cg00859178 | 1          |          |           | 37  | 1       | 1.62E+08 UHMK1                       | NM_175866                           | TSS1500                | chr1:16246N_Shore                    |
| cg00878038 |            | 1        |           | 37  | 7       | 1.51E+08 WDR86                       | NM_198285                           | TSS1500                | chr7:15110Island                     |
| cg00886571 | 1          |          |           | 37  | 14      | 1.05E+08                             |                                     |                        | chr14:1052Island                     |
| cg00891611 | 1          |          |           | 37  | 1       | 1.08E+08                             |                                     |                        |                                      |
| cg00943060 |            | 1        |           | 37  | 7       | 65211784                             |                                     |                        | chr7:65215N_Shelf                    |
| cg00989986 |            | 1        |           | 37  | 8       | 49746558                             |                                     |                        | chr8:49747N_Shore                    |
| cg01022859 | 1          |          |           | 37  | 17      | 60767314 MRC2                        | NM_006039                           | Body                   |                                      |
| cg01029669 | 1          |          |           | 37  | 19      | 46999840 PNMA2                       | NM_020709                           | TSS1500                | chr19:4699S_Shore                    |

|            |   |    |    |          |                          |                                |                                       |
|------------|---|----|----|----------|--------------------------|--------------------------------|---------------------------------------|
| cg01062913 | 1 | 37 | 1  | 1.49E+08 |                          |                                |                                       |
| cg01090026 | 2 | 37 | 6  | 39692382 | KIF6                     | NM_145027                      | Body chr6:39692N_Shore                |
| cg01110552 | 1 | 37 | 10 | 1.04E+08 | MGEA5;MGEA5              | NM_001142434;NM_012215         | TSS1500;TSS1500 chr10:1035S_Shore     |
| cg01120851 | 1 | 37 | 1  | 6657644  | KLHL21                   | NM_014851                      | Body chr1:66591N_Shore                |
| cg01125463 | 1 | 37 | 6  | 42946178 | PEX6                     | NM_000287                      | 1stExon chr6:42946N_Shore             |
| cg01138671 | 1 | 37 | 6  | 32130686 | PPT2;PPT2                | NM_005155;NM_138717            | Body;Body chr6:32134N_Shelf           |
| cg01144965 | 1 | 37 | 8  | 1811760  | ARHGEF10                 | NM_014629                      | Body                                  |
| cg01166564 | 1 | 37 | 2  | 26987492 | C2orf18                  | NM_017877                      | Body chr2:26987Island                 |
| cg01198033 | 1 | 37 | 7  | 1.55E+08 | CNPY1                    | NM_001103176                   | 5'UTR chr7:15530Island                |
| cg01232267 | 1 | 37 | 3  | 47398209 |                          |                                | chr3:47397Island                      |
| cg01263999 | 1 | 37 | 13 | 1.08E+08 | FAM155A                  | NM_001080396                   | Body                                  |
| cg01309395 | 1 | 37 | 6  | 33091795 | HLA-DPB2                 | NR_001435                      | Body                                  |
| cg01316857 | 2 | 37 | 19 | 48685724 |                          |                                | chr19:4868Island                      |
| cg01333080 | 1 | 37 | 3  | 1.84E+08 | ECE2;ECE2;ECE2;ECE2      | NM_001100120;NM_001037324;NM_C | Body;Body;Body;Body chr3:18399S_Shore |
| cg01338043 | 1 | 37 | 7  | 1E+08    | AGFG2                    | NM_006076                      | TSS1500 chr7:10013N_Shore             |
| cg01392841 | 1 | 37 | 19 | 47016869 |                          |                                | chr19:4701Island                      |
| cg01427750 | 1 | 37 | 12 | 1.32E+08 | GPR133                   | NM_198827                      | Body chr12:1315Island                 |
| cg01514015 | 1 | 37 | 1  | 2.36E+08 | GPR137B                  | NM_003272                      | Body                                  |
| cg01515114 | 1 | 37 | 4  | 4139730  |                          |                                |                                       |
| cg01543583 | 1 | 37 | 14 | 59947673 | C14orf149                | NM_144581                      | Body chr14:5995N_Shelf                |
| cg01548562 | 1 | 37 | 9  | 71836408 | TJP2;TJP2;TJP2;TJP2;TJP2 | NM_001170414;NM_001170630;NM_C | Body;Body;Body;Body; chr9:71835Island |
| cg01565438 | 2 | 37 | 17 | 33776554 | SLFN13                   | NM_144682                      | TSS1500 chr17:3377Island              |
| cg01591416 | 1 | 37 | 8  | 30601572 | UBXN8                    | NM_005671                      | TSS200                                |
| cg01620570 | 1 | 37 | 17 | 15165908 | PMP22;PMP22              | NM_153321;NM_000304            | TSS200;5'UTR chr17:1516Island         |
| cg01709473 | 1 | 37 | 6  | 12010960 |                          |                                | chr6:12012N_Shore                     |
| cg01709473 | 1 | 37 | 6  | 12010960 |                          |                                | chr6:12012N_Shore                     |
| cg01721429 | 1 | 37 | 16 | 47007486 | DNAJA2;DNAJA2            | NM_005880;NM_005880            | 5'UTR;1stExon chr16:4700Island        |
| cg01771479 | 1 | 37 | 8  | 1.44E+08 |                          |                                |                                       |
| cg01867419 | 1 | 37 | 6  | 30421515 |                          |                                | chr6:30418S_Shore                     |
| cg01872216 | 1 | 37 | 14 | 54430382 |                          |                                | chr14:5443Island                      |
| cg01900413 | 1 | 37 | 11 | 1.28E+08 | ETS1                     | NM_001143820                   | Body chr11:1284Island                 |
| cg01962086 | 1 | 37 | 3  | 1.96E+08 | TNK2                     | NM_005781                      | TSS1500 chr3:19563S_Shore             |
| cg02055540 | 1 | 37 | 5  | 1.66E+08 |                          |                                |                                       |
| cg02071447 | 1 | 37 | 5  | 1.51E+08 | GLRA1;GLRA1              | NM_000171;NM_001146040         | TSS200;TSS200 chr5:15130Island        |
| cg02148547 | 1 | 37 | 14 | 21457502 | METT11D1;METT11D1        | NM_001029991;NM_022734         | TSS1500;TSS1500 chr14:2145N_Shore     |
| cg02192318 | 1 | 37 | 16 | 89500212 | ANKRD11                  | NM_013275                      | 5'UTR chr16:8950Island                |
| cg02205746 | 1 | 37 | 16 | 2732724  | KCTD5                    | NM_018992                      | 1stExon chr16:2732Island              |
| cg02215141 | 2 | 37 | 4  | 1.33E+08 |                          |                                | chr4:13266N_Shore                     |
| cg02215141 | 6 | 37 | 4  | 1.33E+08 |                          |                                | chr4:13266N_Shore                     |
| cg02216246 | 2 | 37 | 11 | 1.29E+08 | FLI1;FLI1                | NM_002017;NM_001167681         | Body;5'UTR chr11:1285Island           |
| cg02216246 | 1 | 37 | 11 | 1.29E+08 | FLI1;FLI1                | NM_002017;NM_001167681         | Body;5'UTR chr11:1285Island           |
| cg02241363 | 2 | 37 | 17 | 78450357 | NPTX1;NPTX1              | NM_002522;NM_002522            | 5'UTR;1stExon chr17:7844Island        |
| cg02268171 | 2 | 37 | 13 | 24477610 |                          |                                | chr13:2447Island                      |
| cg02275394 | 1 | 37 | 13 | 80917432 |                          |                                | chr13:8091S_Shore                     |
| cg02275622 | 1 | 37 | 2  | 2.08E+08 |                          |                                |                                       |
| cg02286547 | 2 | 37 | 11 | 75920278 |                          |                                | chr11:7591Island                      |
| cg02301193 | 1 | 37 | 1  | 90267201 |                          |                                |                                       |
| cg02301193 | 1 | 37 | 1  | 90267201 |                          |                                |                                       |
| cg02309335 | 1 | 37 | 6  | 30227294 | HLA-L                    | NR_027822                      | TSS200 chr6:30227N_Shore              |
| cg02339418 | 1 | 37 | 12 | 1.24E+08 | C12orf65;C12orf65        | NM_152269;NM_001143905         | TSS200;TSS1500 chr12:1237Island       |

|            |   |    |    |          |                         |                                |                                |                     |            |         |
|------------|---|----|----|----------|-------------------------|--------------------------------|--------------------------------|---------------------|------------|---------|
| cg02358630 | 1 | 37 | 10 | 71993457 | PPA1                    | NM_021129                      | TSS1500                        | chr10:7199          | Island     |         |
| cg02368096 | 2 | 37 | 7  | 98248993 | NPTX2                   | NM_002523                      | Body                           | chr7:98248          | S_Shore    |         |
| cg02398007 | 2 | 37 | 12 | 67616546 |                         |                                |                                |                     |            |         |
| cg02398007 |   | 1  | 37 | 12       | 67616546                |                                |                                |                     |            |         |
| cg02444810 |   | 1  | 37 | 17       | 27055702                | NEK8                           | NM_178170                      | TSS200              | chr17:2705 | Island  |
| cg02448190 | 2 | 37 | 1  | 1.56E+08 | RAB25                   | NM_020387                      | TSS1500                        |                     |            |         |
| cg02448190 |   | 1  | 37 | 1        | 1.56E+08                | RAB25                          | NM_020387                      | TSS1500             |            |         |
| cg02491138 |   | 1  | 37 | 20       | 51589616                | TSHZ2;TSHZ2                    | NM_173485;NM_173485            | 1stExon;5'UTR       | chr20:5158 | N_Shore |
| cg02503646 | 1 | 37 | 3  | 52444059 | PHF7;PHF7;BAP1          | NM_173341;NM_016483;NM_004656  | TSS1500;TSS1500;TSS2           | chr3:52443          | Island     |         |
| cg02504716 |   | 1  | 37 | 11       | 1.24E+08                |                                |                                |                     |            |         |
| cg02529035 |   | 1  | 37 | 2        | 2.2E+08                 | ACCN4;ACCN4                    | NM_182847;NM_018674            | TSS1500;TSS1500     | chr2:22037 | Island  |
| cg02554361 |   | 1  | 37 | 16       | 11001757                | CIITA                          | NM_000246                      | Body                | chr16:1100 | Island  |
| cg02558537 |   | 1  | 37 | 11       | 1.07E+08                | CWF19L2                        | NM_152434                      | TSS200              | chr11:1073 | Island  |
| cg02574502 | 1 | 37 | 19 | 54486058 | CACNG8                  | NM_031895                      | Body                           | chr19:5448          | Island     |         |
| cg02625590 | 1 | 37 | 19 | 41880276 | TMEM91                  | NM_001098825                   | 5'UTR                          | chr19:4188          | N_Shelf    |         |
| cg02633148 |   | 1  | 37 | 4        | 46391476                | GABRA2;GABRA2                  | NM_001114175;NM_000807         | TSS200;5'UTR        | chr4:46391 | N_Shore |
| cg02653364 | 1 | 37 | 16 | 58283706 | CCDC113;CCDC113         | NM_001142302;NM_014157         | TSS200;TSS200                  | chr16:5828          | Island     |         |
| cg02704217 |   | 1  | 37 | 17       | 12568507                | MYOCD;MYOCD                    | NM_153604;NM_001146312         | TSS1500;TSS1500     | chr17:1256 | N_Shore |
| cg02721947 | 1 | 37 | 5  | 39719620 |                         |                                |                                | chr5:39721          | N_Shore    |         |
| cg02734521 |   | 1  | 37 | 6        | 1.08E+08                |                                |                                |                     |            |         |
| cg02804100 | 1 | 37 | 19 | 720993   | PALM;PALM               | NM_002579;NM_001040134         | Body;Body                      | chr19:7190          | S_Shore    |         |
| cg02811702 | 1 | 37 | 13 | 24901961 |                         |                                |                                | chr13:2490          | N_Shore    |         |
| cg02846648 |   | 1  | 37 | 12       | 1.29E+08                | GLT1D1                         | NM_144669                      | Body                |            |         |
| cg02862362 |   | 1  | 37 | 6        | 1.32E+08                | ARG1                           | NM_000045                      | Body                |            |         |
| cg02894027 | 1 | 37 | 2  | 17375162 |                         |                                |                                |                     |            |         |
| cg02904235 |   | 1  | 37 | 14       | 91527369                | RPS6KA5;RPS6KA5                | NM_182398;NM_004755            | TSS1500;TSS1500     | chr14:9152 | Island  |
| cg02947232 |   | 1  | 37 | 20       | 42937544                | FITM2                          | NM_001080472                   | Body                | chr20:4293 | N_Shore |
| cg02962630 | 5 | 37 | 15 | 41222776 | DLL4                    | NM_019074                      | Body                           | chr15:4121          | Island     |         |
| cg02962630 |   | 4  | 37 | 15       | 41222776                | DLL4                           | NM_019074                      | Body                | chr15:4121 | Island  |
| cg02991338 | 1 | 37 | 14 | 29236017 | FOXG1                   | NM_005249                      | TSS1500                        | chr14:2923          | N_Shore    |         |
| cg03003722 | 2 | 37 | 6  | 38035488 | ZFAND3                  | NM_021943                      | Body                           |                     |            |         |
| cg03004273 |   | 1  | 37 | 18       | 7568265                 | PTPRM;PTPRM                    | NM_002845;NM_001105244         | Body;Body           | chr18:7566 | Island  |
| cg03054162 | 1 | 37 | 2  | 70485230 | PCYOX1;PCYOX1           | NM_016297;NM_016297            | 1stExon;5'UTR                  | chr2:70485          | N_Shore    |         |
| cg03069383 |   | 1  | 37 | 2        | 18741691                | RDH14                          | NM_020905                      | 1stExon             | chr2:18741 | Island  |
| cg03069736 |   | 1  | 37 | 17       | 72542117                | CD300C;CD300C                  | NM_006678;NM_006678            | 1stExon;5'UTR       |            |         |
| cg03088705 |   | 1  | 37 | 10       | 1.12E+08                | XPNPEP1;XPNPEP1;XPNPEP1        | NR_030724;NM_001167604;NM_0203 | Body;3'UTR;3'UTR    |            |         |
| cg03103023 |   | 1  | 37 | 1        | 25088406                | CLIC4                          | NM_013943                      | Body                |            |         |
| cg03119288 |   | 1  | 37 | 19       | 10829265                | DNM2;DNM2;DNM2;DNM2            | NM_004945;NM_001005361;NM_001  | Body;Body;Body;Body | chr19:1082 | Island  |
| cg03124231 | 1 | 37 | 4  | 1.74E+08 | HMGB2;HMGB2;HMGB2;HMGB2 | NM_001130689;NM_002129;NM_0011 | TSS1500;1stExon;TSS2           | chr4:17425          | Island     |         |
| cg03212634 | 4 | 37 | 19 | 54292238 |                         |                                |                                |                     |            |         |
| cg03212634 |   | 9  | 37 | 19       | 54292238                |                                |                                |                     |            |         |
| cg03243450 | 1 | 37 | 5  | 1800782  | NDUFS6;MRPL36           | NM_004553;NM_032479            | TSS1500;TSS1500                | chr5:17994          | Island     |         |
| cg03243450 |   | 5  | 37 | 5        | 1800782                 | NDUFS6;MRPL36                  | NM_004553;NM_032479            | TSS1500;TSS1500     | chr5:17994 | Island  |
| cg03249986 | 1 | 37 | 11 | 66383717 | RBM14                   | NM_006328                      | TSS1500                        | chr11:6638          | Island     |         |
| cg03290040 | 1 | 37 | 22 | 24110355 | CHCHD10                 | NM_213720                      | TSS1500                        | chr22:2411          | Island     |         |
| cg03290752 | 1 | 37 | 3  | 1.77E+08 | TBL1XR1                 | NM_024665                      | TSS200                         | chr3:17691          | N_Shore    |         |
| cg03318904 | 1 | 37 | 22 | 39801522 | MAP3K7IP1;MAP3K7IP1     | NM_006116;NM_153497            | Body;Body                      |                     |            |         |
| cg03331282 | 1 | 37 | 1  | 36056567 | TFAP2E                  | NM_178548                      | Body                           |                     |            |         |
| cg03382797 | 1 | 37 | 9  | 1.36E+08 | C9orf98;C9orf9          | NM_152572;NM_018956            | TSS1500;5'UTR                  | chr9:13575          | S_Shore    |         |
| cg03396103 | 1 | 37 | 12 | 1.17E+08 |                         |                                |                                | chr12:1169          | Island     |         |

|            |    |    |    |                                                  |                                        |                               |                   |
|------------|----|----|----|--------------------------------------------------|----------------------------------------|-------------------------------|-------------------|
| cg03396325 | 1  | 37 | 15 | 87876345                                         |                                        |                               |                   |
| cg03414134 | 2  | 37 | 3  | 1.87E+08 BCL6                                    | NM_001706                              | 5'UTR                         | chr3:18746Island  |
| cg03440588 | 3  | 37 | 1  | 47900320 FOXD2;MGC12982                          | NM_004474;NR_026878                    | TSS1500;TSS200                | chr1:47899Island  |
| cg03440588 |    | 37 | 1  | 47900320 FOXD2;MGC12982                          | NM_004474;NR_026878                    | TSS1500;TSS200                | chr1:47899Island  |
| cg03448396 | 1  | 37 | 3  | 38495949 LOC100128640;ACVR2B                     | NR_028389;NM_001106                    | Body;Body                     | chr3:38495Island  |
| cg03539051 |    | 37 | 19 | 56418660 NLRP13                                  | NM_176810                              | Body                          |                   |
| cg03558399 | 2  | 37 | 3  | 67022555                                         |                                        |                               |                   |
| cg03558805 |    | 37 | 7  | 73184883 CLDN3                                   | NM_001306                              | TSS1500                       | chr7:73183Island  |
| cg03586240 | 1  | 37 | 7  | 1966361 MAD1L1;MAD1L1;MAD1L1                     | NM_003550;NM_001013837;NM_001013837    | Body;Body;Body                | chr7:19676N_Shore |
| cg03593908 | 1  | 37 | 13 | 60842299                                         |                                        |                               |                   |
| cg03597540 |    | 37 | 1  | 1.5E+08 HIST2H2BE;HIST2H2AC;HIST2H2BE            | NM_003528;NM_003517;NM_003528          | 1stExon;TSS1500;3'UTR         | chr1:14985N_Shore |
| cg03623968 |    | 37 | 3  | 1.29E+08 RAB7A                                   | NM_004637                              | Body                          |                   |
| cg03632289 | 1  | 37 | 11 | 71301062                                         |                                        |                               |                   |
| cg03657549 |    | 37 | 7  | 1.28E+08 METTL2B;METTL2B                         | NM_018396;NM_018396                    | 5'UTR;1stExon                 | chr7:12811Island  |
| cg03672997 |    | 37 | 10 | 7859623 TAF3                                     | NM_031923                              | TSS1500                       | chr10:7860N_Shore |
| cg03677929 | 1  | 37 | 12 | 7342174 PEX5;PEX5;PEX5;PEX5;PEX5                 | NM_000319;NM_001131023;NM_001131023    | TSS1500;TSS200;TSS200         | chr12:7342Island  |
| cg03677929 |    | 37 | 12 | 7342174 PEX5;PEX5;PEX5;PEX5;PEX5                 | NM_000319;NM_001131023;NM_001131023    | TSS1500;TSS200;TSS200         | chr12:7342Island  |
| cg03687650 | 7  | 37 | 11 | 3144685 OSBPL5;OSBPL5;OSBPL5                     | NM_020896;NM_001144063;NM_145606       | Body;Body;Body                | chr11:3141S_Shelf |
| cg03687650 |    | 37 | 11 | 3144685 OSBPL5;OSBPL5;OSBPL5                     | NM_020896;NM_001144063;NM_145606       | Body;Body;Body                | chr11:3141S_Shelf |
| cg03703325 |    | 37 | 3  | 50606864 HEMK1                                   | NM_016173                              | TSS200                        | chr3:50606Island  |
| cg03733229 | 2  | 37 | 21 | 46824701 COL18A1                                 | NM_130445                              | TSS1500                       | chr21:4682Island  |
| cg03799405 | 2  | 37 | 4  | 1595726                                          |                                        |                               | chr4:15952S_Shore |
| cg03822003 |    | 37 | 16 | 30569878 ZNF764                                  | NM_033410                              | TSS1500                       | chr16:3056Island  |
| cg03870777 | 10 | 37 | 12 | 53342755 KRT18;KRT18                             | NM_000224;NM_199187                    | TSS200;5'UTR                  | chr12:5334N_Shore |
| cg03870777 |    | 37 | 12 | 53342755 KRT18;KRT18                             | NM_000224;NM_199187                    | TSS200;5'UTR                  | chr12:5334N_Shore |
| cg03916104 |    | 37 | 1  | 6314748 GPR153                                   | NM_207370                              | Body                          | chr1:63137S_Shore |
| cg03928690 | 1  | 37 | 2  | 1.98E+08 MOBKL3;MOBKL3;MOBKL3                    | NM_199482;NM_001100819;NM_015506       | 5'UTR;Body;Body               | chr2:19838Island  |
| cg03937591 | 1  | 37 | 4  | 899553 GAK                                       | NM_005255                              | Body                          | chr4:89977N_Shore |
| cg04016326 |    | 37 | 12 | 14132940 GRIN2B;GRIN2B                           | NM_000834;NM_000834                    | 1stExon;5'UTR                 | chr12:1413N_Shore |
| cg04035728 | 1  | 37 | 8  | 27323467 CHRNA2                                  | NM_000742                              | Body                          | chr8:27320S_Shelf |
| cg04072156 | 1  | 37 | 3  | 1.49E+08 CPB1                                    | NM_001871                              | TSS1500                       |                   |
| cg04083921 | 2  | 37 | 5  | 1.31E+08 RAPGEF6;RAPGEF6;RAPGEF6;RAPGEF6;RAPGEF6 | NM_001164388;NM_001164386;NM_001164386 | Body;Body;Body;Body;Body;Body |                   |
| cg04101351 |    | 37 | 12 | 20522672 PDE3A                                   | NM_000921                              | 1stExon                       | chr12:2052Island  |
| cg04113418 | 1  | 37 | 19 | 49646093 PPFIA3                                  | NM_003660                              | Body                          | chr19:4964Island  |
| cg04120546 | 1  | 37 | 8  | 1.26E+08 MTSS1                                   | NM_014751                              | TSS200                        | chr8:12573Island  |
| cg04166812 | 1  | 37 | 14 | 61122051                                         |                                        |                               | chr14:6112N_Shore |
| cg04171803 | 1  | 37 | 2  | 2.34E+08 GIGYF2;GIGYF2;GIGYF2;GIGYF2             | NM_015575;NM_001103148;NM_001103148    | TSS200;TSS200;TSS200          | chr2:23356N_Shore |
| cg04186622 | 1  | 37 | 1  | 1.49E+08                                         |                                        |                               | chr1:14855Island  |
| cg04199621 | 1  | 37 | 6  | 30955712 MUC21                                   | NM_001010909                           | Body                          |                   |
| cg04215672 | 1  | 37 | 4  | 4108791                                          |                                        |                               | chr4:41087Island  |
| cg04223160 |    | 37 | 14 | 23755398 HOMEZ                                   | NM_020834                              | TSS200                        | chr14:2375Island  |
| cg04254690 |    | 37 | 4  | 25031951 LGI2                                    | NM_018176                              | Body                          | chr4:25032N_Shore |
| cg04262428 | 2  | 37 | 11 | 70673256 SHANK2                                  | NM_012309                              | Body                          | chr11:7067S_Shore |
| cg04285141 | 2  | 37 | 16 | 57872427                                         |                                        |                               |                   |
| cg04285141 |    | 37 | 16 | 57872427                                         |                                        |                               |                   |
| cg04293489 |    | 37 | 6  | 49917881 DEF8133                                 | NM_001166478                           | TSS1500                       |                   |
| cg04357082 | 1  | 37 | 16 | 980022 LMF1                                      | NM_022773                              | Body                          | chr16:9797Island  |
| cg04357082 |    | 37 | 16 | 980022 LMF1                                      | NM_022773                              | Body                          | chr16:9797Island  |
| cg04360049 | 1  | 37 | 1  | 1.58E+08 CD1D                                    | NM_001766                              | 5'UTR                         | chr1:15815Island  |
| cg04381865 | 1  | 37 | 16 | 15219673                                         |                                        |                               | chr16:1522N_Shore |



|            |   |   |    |    |          |                            |                                        |                         |                   |
|------------|---|---|----|----|----------|----------------------------|----------------------------------------|-------------------------|-------------------|
| cg04406981 |   | 1 | 37 | 19 | 48453315 | SNAR-C3                    | NR_024221                              | TSS1500                 |                   |
| cg04427003 |   | 4 | 37 | 5  | 63257499 | HTR1A                      | NM_000524                              | 1stExon                 | chr5:63256Island  |
| cg04441477 |   | 4 | 37 | 16 | 24267399 | CACNG3;CACNG3              | NM_006539;NM_006539                    | 1stExon;5'UTR           | chr16:2426Island  |
| cg04493430 |   | 1 | 37 | 16 | 1030388  | SOX8                       | NM_014587                              | TSS1500                 | chr16:1029Island  |
| cg04498153 | 1 |   | 37 | 7  | 1.58E+08 | PTPRN2;PTPRN2;PTPRN2       | NM_002847;NM_130842;NM_130843          | Body;Body;Body          | chr7:15769N_Shore |
| cg04498153 |   | 3 | 37 | 7  | 1.58E+08 | PTPRN2;PTPRN2;PTPRN2       | NM_002847;NM_130842;NM_130843          | Body;Body;Body          | chr7:15769N_Shore |
| cg04529860 |   | 2 | 37 | 19 | 39900650 |                            |                                        |                         | chr19:3990Island  |
| cg04544058 |   | 1 | 37 | 3  | 13609195 | FBLN2;FBLN2;FBLN2          | NM_001165035;NM_001004019;NM_001004019 | TSS1500;5'UTR;5'UTR     | chr3:13611N_Shelf |
| cg04574459 |   | 1 | 37 | 21 | 47010768 |                            |                                        |                         | chr21:4700Island  |
| cg04691540 |   | 1 | 37 | 1  | 1.79E+08 | ABL2;ABL2;ABL2;ABL2;ABL2   | NM_001136001;NM_001168238;NM_001168238 | 1stExon;1stExon;1stExon | chr1:17919Island  |
| cg04706600 | 2 |   | 37 | 5  | 1.79E+08 | ADAMTS2;ADAMTS2            | NM_021599;NM_014244                    | Body;Body               |                   |
| cg04706600 |   | 4 | 37 | 5  | 1.79E+08 | ADAMTS2;ADAMTS2            | NM_021599;NM_014244                    | Body;Body               |                   |
| cg04723723 |   | 1 | 37 | 1  | 67966270 |                            |                                        |                         |                   |
| cg04729004 |   | 1 | 37 | 7  | 1.29E+08 | KCP;KCP                    | NM_001135914;NM_199349                 | TSS200;TSS200           | chr7:12855S_Shore |
| cg04737185 |   | 1 | 37 | 11 | 1445041  | BRSK2                      | NM_003957                              | Body                    |                   |
| cg04786330 |   | 1 | 37 | 12 | 27091356 | C12orf11;FGFR1OP2;FGFR1OP2 | NM_018164;NM_015633;NM_015633          | TSS200;5'UTR;1stExon    | chr12:2709Island  |
| cg04819714 | 1 |   | 37 | 11 | 1.01E+08 | FLJ32810;TMEM133           | NM_152432;NM_032021                    | 3'UTR;TSS1500           |                   |
| cg04821026 | 1 |   | 37 | 21 | 15068553 |                            |                                        |                         | chr21:1506N_Shore |
| cg04837170 | 1 |   | 37 | 16 | 1494876  | CCDC154                    | NM_001143980                           | TSS1500                 | chr16:1495N_Shore |
| cg04884908 |   | 2 | 37 | 2  | 72374840 | CYP26B1                    | NM_019885                              | 1stExon                 | chr2:72371Island  |
| cg04891086 | 1 |   | 37 | 12 | 5018513  | KCNA1                      | NM_000217                              | TSS1500                 | chr12:5018N_Shore |
| cg04899500 | 1 |   | 37 | 19 | 48965791 | KCNJ14;KCNJ14              | NM_170720;NM_013348                    | Body;Body               | chr19:4896Island  |
| cg05025392 | 1 |   | 37 | 17 | 14738114 |                            |                                        |                         |                   |
| cg05070971 | 2 |   | 37 | 21 | 43239518 | PRDM15;PRDM15              | NM_022115;NM_001040424                 | Body;Body               | chr21:4324N_Shore |
| cg05070971 |   | 1 | 37 | 21 | 43239518 | PRDM15;PRDM15              | NM_022115;NM_001040424                 | Body;Body               | chr21:4324N_Shore |
| cg05088794 | 1 |   | 37 | 18 | 33081137 |                            |                                        |                         | chr18:3307S_Shelf |
| cg05101846 | 1 |   | 37 | 17 | 72580962 | C17orf77;CD300LD           | NM_152460;NM_001115152                 | TSS200;Body             |                   |
| cg05157470 | 1 |   | 37 | 6  | 28937310 |                            |                                        |                         |                   |
| cg05229450 | 1 |   | 37 | 6  | 1.69E+08 |                            |                                        |                         |                   |
| cg05240017 | 2 |   | 37 | 5  | 40756081 | TTC33                      | NM_012382                              | TSS200                  | chr5:40755Island  |
| cg05240017 |   | 1 | 37 | 5  | 40756081 | TTC33                      | NM_012382                              | TSS200                  | chr5:40755Island  |
| cg05242257 | 1 |   | 37 | 16 | 2588092  | PDPK1;PDPK1;PDPK1;PDPK1    | NM_031268;NM_002613;NM_031268          | 5'UTR;1stExon;1stExon   | chr16:2588Island  |
| cg05304037 | 1 |   | 37 | 19 | 50094202 | PRR12;PRRG2                | NM_020719;NM_000951                    | TSS1500;3'UTR           | chr19:5009Island  |
| cg05377387 | 1 |   | 37 | 16 | 84328658 | WFDC1                      | NM_021197                              | 1stExon                 | chr16:8432Island  |
| cg05388057 | 1 |   | 37 | 1  | 78226545 | USP33;USP33;USP33          | NM_015017;NM_201626;NM_201624          | TSS1500;TSS1500;TSS1500 | chr1:78224S_Shore |
| cg05436007 | 1 |   | 37 | 6  | 1.47E+08 |                            |                                        |                         |                   |
| cg05436007 |   | 1 | 37 | 6  | 1.47E+08 |                            |                                        |                         |                   |
| cg05553502 |   | 1 | 37 | 5  | 92924091 | NR2F1                      | NM_005654                              | Body                    | chr5:92923Island  |
| cg05587853 | 7 |   | 37 | 3  | 1.36E+08 | MSL2;MSL2                  | NM_001145417;NM_018133                 | TSS1500;TSS200          | chr3:13591Island  |
| cg05592114 | 1 |   | 37 | 12 | 7244104  | C1R                        | NM_001733                              | Body                    |                   |
| cg05597349 | 1 |   | 37 | 10 | 1.03E+08 | TLX1NB                     | NM_001085398                           | 5'UTR                   | chr10:1028Island  |
| cg05634255 |   | 1 | 37 | 4  | 1.39E+08 |                            |                                        |                         |                   |
| cg05668926 | 1 |   | 37 | 7  | 39609343 | C7orf36                    | NM_020192                              | Body                    | chr7:39605S_Shelf |
| cg05743054 | 2 |   | 37 | 3  | 1.58E+08 | MLF1;MLF1;MLF1             | NM_001130156;NM_022443;NM_001130156    | TSS200;TSS200;TSS200    | chr3:15828Island  |
| cg05757007 |   | 1 | 37 | 6  | 1.01E+08 | ASCC3                      | NM_006828                              | Body                    |                   |
| cg05835009 |   | 1 | 37 | 4  | 710272   | PCGF3                      | NM_006315                              | 5'UTR                   | chr4:71392N_Shelf |
| cg05851240 | 1 |   | 37 | 18 | 72201663 | CNDP1                      | NM_032649                              | TSS200                  |                   |
| cg05852760 |   | 1 | 37 | 7  | 23508224 | IGF2BP3                    | NM_006547                              | Body                    | chr7:23508Island  |
| cg05854114 | 1 |   | 37 | 12 | 77719408 |                            |                                        |                         | chr12:7771Island  |
| cg05907237 |   | 1 | 37 | 10 | 1.27E+08 | CTBP2;CTBP2;CTBP2          | NM_001083914;NM_001083914;NM_001083914 | 1stExon;5'UTR;TSS1500   | chr10:1268Island  |

|            |    |    |    |                                                           |                                                     |                                                 |                   |  |
|------------|----|----|----|-----------------------------------------------------------|-----------------------------------------------------|-------------------------------------------------|-------------------|--|
| cg05931119 | 1  | 37 | 6  | 1.69E+08                                                  |                                                     |                                                 |                   |  |
| cg05936555 | 2  | 37 | 6  | 30539508 ABCF1;ABCF1                                      | NM_001090;NM_001025091                              | Body;Body                                       | chr6:305385_Shore |  |
| cg05952475 | 1  | 37 | 6  | 1.64E+08 PACRG;PACRG;PACRG                                | NM_152410;NM_001080378;NM_001080378                 | Body;Body;Body                                  |                   |  |
| cg05963872 | 1  | 37 | 7  | 63652631                                                  |                                                     |                                                 | chr7:63652Island  |  |
| cg06016354 | 3  | 37 | 6  | 32163966 GPSM3;NOTCH4                                     | NM_022107;NM_004557                                 | TSS1500;Body                                    | chr6:32163Island  |  |
| cg06039161 | 1  | 37 | 11 | 70672835 SHANK2                                           | NM_012309                                           | Body                                            | chr11:7067Island  |  |
| cg06079468 | 1  | 37 | 10 | 81839181 LOC219347;LOC219347;LOC219347;C10orf57;LOC219347 | NR_027430;NR_027431;NR_027428;NR_027429             | TSS1500;TSS1500;TSS1500                         | chr10:81835_Shore |  |
| cg06081199 | 1  | 37 | 7  | 1.17E+08 CFTR;CFTR                                        | NM_000492;NM_000492                                 | 1stExon;5'UTR                                   |                   |  |
| cg06087019 | 1  | 37 | 3  | 27770182                                                  |                                                     |                                                 | chr3:27771N_Shore |  |
| cg06090383 | 1  | 37 | 4  | 1.74E+08 SAP30                                            | NM_003864                                           | 1stExon                                         | chr4:17429Island  |  |
| cg06098215 | 2  | 37 | 10 | 51575702 NCOA4;NCOA4;NCOA4;NCOA4;NCOA4                    | NM_005437;NM_001145263;NM_00115'UTR;5'UTR;Body;TSS1 | chr10:51575_Shelf                               |                   |  |
| cg06153883 | 1  | 37 | 7  | 1.37E+08 CHRM2;CHRM2;CHRM2;CHRM2;CHRM2;CHRM2              | NM_001006631;NM_000739;NM_001006631                 | 5'UTR;5'UTR;5'UTR;5'UTR;5'UTR;5'UTR;5'UTR;5'UTR | chr8:14353Island  |  |
| cg06166932 | 1  | 37 | 8  | 1.44E+08                                                  |                                                     |                                                 |                   |  |
| cg06180519 | 2  | 37 | 10 | 32800689 CCDC7;CCDC7                                      | NM_145023;NM_001026383                              | Body;Body                                       |                   |  |
| cg06180519 | 3  | 37 | 10 | 32800689 CCDC7;CCDC7                                      | NM_145023;NM_001026383                              | Body;Body                                       |                   |  |
| cg06212297 | 1  | 37 | 16 | 48079666                                                  |                                                     |                                                 |                   |  |
| cg06254801 | 2  | 37 | 9  | 79379216 PCA3;PRUNE2                                      | NR_015342;NM_015225                                 | TSS200;Body                                     |                   |  |
| cg06319785 | 1  | 37 | 2  | 75437207                                                  |                                                     |                                                 |                   |  |
| cg06326713 | 1  | 37 | 17 | 20745278                                                  |                                                     |                                                 | chr17:2074N_Shore |  |
| cg06329022 | 5  | 37 | 17 | 26926511 SPAG5                                            | NM_006461                                           | TSS1500                                         | chr17:2692Island  |  |
| cg06354519 | 1  | 37 | 1  | 27939417 FGR;FGR;FGR                                      | NM_005248;NM_001042729;NM_001042729                 | 3'UTR;3'UTR;3'UTR                               | chr1:27941N_Shelf |  |
| cg06409741 | 11 | 37 | 13 | 1.15E+08 RASA3                                            | NM_007368                                           | Body                                            | chr13:1147Island  |  |
| cg06409741 | 11 | 37 | 13 | 1.15E+08 RASA3                                            | NM_007368                                           | Body                                            | chr13:1147Island  |  |
| cg06444730 | 1  | 37 | 1  | 84544284 PRKACB;PRKACB                                    | NM_002731;NM_207578                                 | Body;Body                                       | chr1:84543S_Shore |  |
| cg06452419 | 1  | 37 | 17 | 55938940                                                  |                                                     |                                                 | chr17:5593N_Shore |  |
| cg06456389 | 2  | 37 | 10 | 99052468 ARHGAP19                                         | NM_032900                                           | TSS200                                          | chr10:9905Island  |  |
| cg06466917 | 1  | 37 | 5  | 17216259 LOC285696;BASP1                                  | NR_027253;NM_006317                                 | Body;TSS1500                                    | chr5:17216N_Shore |  |
| cg06483559 | 1  | 37 | 11 | 1.24E+08 OR6X1                                            | NM_001005188                                        | 1stExon                                         |                   |  |
| cg06502456 | 2  | 37 | 15 | 25304609 SNORD116-4                                       | NR_003319                                           | TSS200                                          |                   |  |
| cg06502456 | 1  | 37 | 15 | 25304609 SNORD116-4                                       | NR_003319                                           | TSS200                                          |                   |  |
| cg06515771 | 1  | 37 | 6  | 26614168                                                  |                                                     |                                                 | chr6:26614Island  |  |
| cg06521472 | 1  | 37 | 16 | 88990232 CBFA2T3;CBFA2T3                                  | NM_175931;NM_005187                                 | 5'UTR;Body                                      | chr16:8899N_Shelf |  |
| cg06525193 | 1  | 37 | 2  | 2.38E+08                                                  |                                                     |                                                 |                   |  |
| cg06525491 | 5  | 37 | 11 | 71353991                                                  |                                                     |                                                 | chr11:7135S_Shelf |  |
| cg06528306 | 1  | 37 | 8  | 53852661 NPBWR1                                           | NM_005285                                           | 1stExon                                         | chr8:53851Island  |  |
| cg06546406 | 2  | 37 | 1  | 39269756                                                  |                                                     |                                                 | chr1:39269Island  |  |
| cg06577604 | 1  | 37 | 3  | 1.84E+08 EPHB3                                            | NM_004443                                           | TSS200                                          | chr3:18427Island  |  |
| cg06594186 | 1  | 37 | 7  | 12971260                                                  |                                                     |                                                 |                   |  |
| cg06638787 | 1  | 37 | 6  | 5997243                                                   |                                                     |                                                 | chr6:59970Island  |  |
| cg06677013 | 1  | 37 | 6  | 84570388 CYB5R4                                           | NM_016230                                           | Body                                            | chr6:84569S_Shore |  |
| cg06681324 | 2  | 37 | 2  | 1.65E+08                                                  |                                                     |                                                 |                   |  |
| cg06681324 | 1  | 37 | 2  | 1.65E+08                                                  |                                                     |                                                 |                   |  |
| cg06731021 | 1  | 37 | 6  | 1.16E+08 COL10A1;NT5DC1                                   | NM_000493;NM_152729                                 | Body;Body                                       |                   |  |
| cg06766273 | 2  | 37 | 11 | 62521983 ZBTB3                                            | NM_024784                                           | TSS1500                                         | chr11:6252S_Shore |  |
| cg06796869 | 1  | 37 | 1  | 2.28E+08 OBSCN;OBSCN                                      | NM_052843;NM_001098623                              | Body;Body                                       | chr1:22847N_Shelf |  |
| cg06800849 | 1  | 37 | 16 | 89180587 ACSF3;ACSF3;ACSF3                                | NM_174917;NR_023316;NM_0011272                      | Body;Body;Body                                  |                   |  |
| cg06816239 | 2  | 37 | 1  | 1.7E+08 SELL;SELL                                         | NM_000655;NR_029467                                 | Body;TSS1500                                    |                   |  |
| cg06894723 | 1  | 37 | 13 | 1.1E+08                                                   |                                                     |                                                 |                   |  |
| cg06900229 | 1  | 37 | 17 | 48556928 RSAD1                                            | NM_018346                                           | Body                                            | chr17:4855S_Shore |  |
| cg06902609 | 2  | 37 | 7  | 985719 ADAP1                                              | NM_006869                                           | Body                                            | chr7:98561Island  |  |

|            |   |    |    |          |                 |                                |                                                           |
|------------|---|----|----|----------|-----------------|--------------------------------|-----------------------------------------------------------|
| cg06916315 | 1 | 37 | 5  | 1.74E+08 |                 |                                | chr5:17417Island                                          |
| cg06996175 | 1 | 37 | 19 | 2546877  | GNG7            | NM_052847                      | 5'UTR<br>chr19:2546Island                                 |
| cg07054668 | 1 | 37 | 3  | 52811637 | ITIH1;ITIH1     | NM_002215;NM_001166434         | 1stExon;TSS1500                                           |
| cg07061145 | 1 | 37 | 15 | 78556178 | DNAJA4;DNAJA4   | NM_018602;NM_001130182         | TSS1500;TSS1500<br>chr15:7855N_Shore<br>chr3:51638N_Shelf |
| cg07089698 | 1 | 37 | 3  | 5161802  |                 |                                |                                                           |
| cg07102406 | 1 | 37 | 16 | 2294639  | DCI             | NM_001919                      | Body                                                      |
| cg07102406 | 1 | 37 | 16 | 2294639  | DCI             | NM_001919                      | Body                                                      |
| cg07115206 | 1 | 37 | 16 | 6425686  | A2BP1;A2BP1     | NM_001142333;NM_018723         | 5'UTR;5'UTR                                               |
| cg07119830 | 1 | 37 | 10 | 1.04E+08 | TRIM8           | NM_030912                      | Body                                                      |
| cg07139514 | 1 | 37 | 2  | 10665727 |                 |                                | chr2:10666N_Shore                                         |
| cg07145255 | 1 | 37 | 5  | 59995354 | DEPDC1B;DEPDC1B | NM_018369;NM_001145208         | Body;Body<br>chr5:59995N_Shore                            |
| cg07163173 | 1 | 37 | 2  | 67624373 | ETAA1           | NM_019002                      | TSS200<br>chr2:67624Island                                |
| cg07165115 | 1 | 37 | 2  | 82756475 |                 |                                |                                                           |
| cg07165756 | 1 | 37 | 11 | 66311422 | ZDHHC24         | NM_207340                      | Body<br>chr11:6631N_Shore                                 |
| cg07170752 | 1 | 37 | 1  | 2.25E+08 | DNAH14          | NM_001373                      | Body                                                      |
| cg07184658 | 2 | 37 | 9  | 96722329 |                 |                                | chr9:96720Island                                          |
| cg07190543 | 1 | 37 | 7  | 82611154 | ICA1;ICA1;ICA1  | NM_004968;NM_001136020;NM_0223 | Body;Body;Body                                            |
| cg07216337 | 1 | 37 | 8  | 75233610 | JPH1            | NM_020647                      | TSS200<br>chr8:75232Island                                |
| cg07258847 | 2 | 37 | 6  | 66708570 |                 |                                |                                                           |
| cg07258847 | 6 | 37 | 6  | 66708570 |                 |                                |                                                           |
| cg07266964 | 1 | 37 | 2  | 1.36E+08 |                 |                                |                                                           |
| cg07276861 | 1 | 37 | 4  | 76862355 | NAAA;NAAA       | NM_014435;NM_001042402         | TSS200;TSS200<br>chr4:76861Island                         |
| cg07288557 | 3 | 37 | 12 | 47226301 |                 |                                | chr12:4722S_Shore                                         |
| cg07304175 | 1 | 37 | 3  | 1.81E+08 | SOX2OT          | NR_004053                      | Body<br>chr3:18141S_Shore                                 |
| cg07321237 | 1 | 37 | 7  | 82754608 | PCL0;PCL0       | NM_014510;NM_033026            | Body;Body                                                 |
| cg07331204 | 1 | 37 | 6  | 74998385 |                 |                                |                                                           |
| cg07367469 | 1 | 37 | 5  | 1.16E+08 |                 |                                |                                                           |
| cg07379140 | 5 | 37 | 1  | 95538546 | ALG14           | NM_144988                      | TSS200<br>chr1:95538Island                                |
| cg07379140 | 1 | 37 | 1  | 95538546 | ALG14           | NM_144988                      | TSS200<br>chr1:95538Island                                |
| cg07476643 | 1 | 37 | 10 | 1.03E+08 |                 |                                | chr10:1027N_Shore                                         |
| cg07483064 | 1 | 37 | 1  | 8938751  | ENO1;ENO1       | NM_001428;NM_001428            | 1stExon;5'UTR<br>chr1:89380Island                         |
| cg07487925 | 1 | 37 | 17 | 25620950 | WSB1;WSB1       | NM_015626;NM_134265            | TSS200;TSS200<br>chr17:2562N_Shore                        |
| cg07493834 | 1 | 37 | 2  | 22114272 |                 |                                |                                                           |
| cg07499372 | 1 | 37 | 19 | 57631232 | USP29           | NM_020903                      | TSS1500<br>chr19:5763S_Shore                              |
| cg07517948 | 1 | 37 | 15 | 67801494 |                 |                                |                                                           |
| cg07549590 | 1 | 37 | 16 | 15018862 |                 |                                | chr16:1501Island                                          |
| cg07554478 | 1 | 37 | 3  | 1.13E+08 | ATP6V1A         | NM_001690                      | 5'UTR                                                     |
| cg07562918 | 2 | 37 | 9  | 21994435 | CDKN2A;CDKN2BAS | NM_058195;NR_003529            | 1stExon;TSS1500<br>chr9:21994Island                       |
| cg07576142 | 1 | 37 | 13 | 93879769 | GPC6            | NM_005708                      | 1stExon<br>chr13:9387Island                               |
| cg07581226 | 2 | 37 | 2  | 2939627  |                 |                                |                                                           |
| cg07588141 | 1 | 37 | 3  | 1.06E+08 | CBLB            | NM_170662                      | TSS1500<br>chr3:10558Island                               |
| cg07596845 | 1 | 37 | 6  | 82957841 | IBTK            | NM_015525                      | TSS1500<br>chr6:82957Island                               |
| cg07602984 | 1 | 37 | 1  | 36790927 | FAM176B         | NM_018166                      | TSS1500<br>chr1:36786S_Shore                              |
| cg07605410 | 1 | 37 | 1  | 16828163 |                 |                                | chr1:16825S_Shore                                         |
| cg07633317 | 1 | 37 | 16 | 49732623 | ZNF423          | NM_015069                      | Body<br>chr16:4973Island                                  |
| cg07695475 | 1 | 37 | 15 | 1.02E+08 | OR4F15          | NM_001001674                   | 1stExon                                                   |
| cg07741793 | 1 | 37 | 17 | 26989030 | SDF2;SUPT6H     | NM_006923;NM_003170            | TSS200;TSS1500<br>chr17:2698Island                        |
| cg07743117 | 2 | 37 | 5  | 77146278 |                 |                                | chr5:77146N_Shore                                         |
| cg07749943 | 1 | 37 | 4  | 3468188  | DOK7;DOK7       | NM_173660;NM_001164673         | Body;Body<br>chr4:34647S_Shelf                            |
| cg07772660 | 1 | 37 | 1  | 17085863 | MST1P9          | NR_002729                      | Body<br>chr1:17085Island                                  |

|            |   |   |    |    |          |                               |                                        |                                    |                   |
|------------|---|---|----|----|----------|-------------------------------|----------------------------------------|------------------------------------|-------------------|
| cg07772660 |   | 9 | 37 | 1  | 17085863 | MST1P9                        | NR_002729                              | Body                               | chr1:17085Island  |
| cg07781162 | 1 |   | 37 | 17 | 74533951 | CYGB                          | NM_134268                              | TSS200                             | chr17:7453Island  |
| cg07812819 | 1 |   | 37 | 7  | 89975908 | GTPBP10;GTPBP10               | NM_001042717;NM_033107                 | TSS200;TSS200                      | chr7:89975Island  |
| cg07813249 | 1 |   | 37 | 4  | 46392253 | GABRA2;GABRA2                 | NM_000807;NM_001114175                 | TSS200;TSS1500                     | chr4:46391Island  |
| cg07813747 |   | 1 | 37 | 16 | 21514953 | LOC100271836                  | NR_027155                              | TSS1500                            | chr16:2151S_Shore |
| cg07817024 |   | 1 | 37 | 1  | 1.2E+08  |                               |                                        |                                    | chr1:11953N_Shore |
| cg07835814 | 1 |   | 37 | 20 | 32077669 | CBFA2T2                       | NM_001032999                           | TSS1500                            | chr20:3207Island  |
| cg07864467 | 1 |   | 37 | 10 | 1.34E+08 |                               |                                        |                                    |                   |
| cg07883117 | 1 |   | 37 | 7  | 1.01E+08 | EMID2                         | NM_133457                              | TSS1500                            | chr7:10100N_Shore |
| cg07908805 |   | 2 | 37 | 19 | 427022   | SHC2                          | NM_012435                              | Body                               | chr19:4267Island  |
| cg07919744 | 1 |   | 37 | 15 | 52873609 | KIAA1370                      | NM_019600                              | 3'UTR                              |                   |
| cg07962315 | 1 | 1 | 37 | 9  | 77704473 | OSTF1;C9orf95;C9orf95;C9orf95 | NM_012383;NR_023352;NM_00112761        | Body;TSS1500;TSS1500               | chr9:77702S_Shore |
| cg07966388 | 1 |   | 37 | 15 | 93363564 |                               |                                        |                                    |                   |
| cg08028004 | 1 |   | 37 | 2  | 1.09E+08 | RANBP2;RANBP2                 | NM_006267;NM_006267                    | 1stExon;5'UTR                      | chr2:10933Island  |
| cg08035555 | 1 |   | 37 | 19 | 3558417  | C19orf28;C19orf28;C19orf28    | NM_021731;NM_001042680;NM_1745         | TSS1500;TSS1500;TSS1500            | chr19:3556S_Shore |
| cg08076266 | 1 |   | 37 | 2  | 1.2E+08  | TMEM37                        | NM_183240                              | Body                               | chr2:12019Island  |
| cg08237220 | 1 |   | 37 | 3  | 1.56E+08 |                               |                                        |                                    |                   |
| cg08242475 |   | 1 | 37 | 7  | 1327791  |                               |                                        |                                    | chr7:13285N_Shore |
| cg08269037 |   | 1 | 37 | 1  | 11751616 | MAD2L2;C1orf187;MAD2L2        | NM_001127325;NM_198545;NM_00115        | UTR;TSS200;1stExon                 | chr1:11750Island  |
| cg08318726 | 1 |   | 37 | 12 | 1.15E+08 | TBX5;TBX5;TBX5                | NM_181486;NM_000192;NM_080717          | TSS1500;5'UTR;5'UTR                | chr12:1148N_Shore |
| cg08356503 | 1 |   | 37 | 16 | 88105836 | BANP;BANP                     | NM_017869;NM_079837                    | Body;Body                          | chr16:8810Island  |
| cg08376824 | 1 |   | 37 | 20 | 5987738  | CRLS1;CRLS1                   | NM_019095;NM_001127458                 | Body;TSS200                        | chr20:5986S_Shore |
| cg08447792 | 1 |   | 37 | 4  | 1.11E+08 | CCDC109B                      | NM_017918                              | Body                               |                   |
| cg08453096 |   | 1 | 37 | 2  | 44065893 | ABCG5;ABCG8;ABCG5             | NM_022436;NM_022437;NM_022436          | 5'UTR;TSS1500;1stExon              |                   |
| cg08476757 | 1 |   | 37 | 3  | 1.08E+08 | IFT57                         | NM_018010                              | Body                               | chr3:10794Island  |
| cg08514765 | 2 |   | 37 | 16 | 58058888 | MMP15                         | NM_002428                              | TSS1500                            | chr16:5805Island  |
| cg08521684 | 1 |   | 37 | 3  | 1.95E+08 | MUC4;MUC4;MUC4                | NM_018406;NM_138297;NM_004532          | Body;Body;Body                     | chr3:19548Island  |
| cg08561442 | 1 |   | 37 | 16 | 49891857 |                               |                                        |                                    | chr16:4988Island  |
| cg08592761 |   | 1 | 37 | 15 | 71146185 | LARP6;LARP6                   | NM_197958;NM_018357                    | Body;Body                          | chr15:7114Island  |
| cg08623277 | 1 |   | 37 | 2  | 2.06E+08 | PARD3B;PARD3B;PARD3B          | NM_152526;NM_057177;NM_205863          | Body;Body;Body                     |                   |
| cg08643994 |   | 1 | 37 | 4  | 1.42E+08 |                               |                                        |                                    |                   |
| cg08658621 | 1 |   | 37 | 10 | 1.34E+08 | DPYSL4                        | NM_006426                              | TSS1500                            | chr10:1339Island  |
| cg08671647 | 1 |   | 37 | 4  | 30724564 | PCDH7;PCDH7;PCDH7             | NM_032456;NM_032457;NM_002589          | 1stExon;Body;1stExon               | chr4:30721Island  |
| cg08671647 |   | 2 | 37 | 4  | 30724564 | PCDH7;PCDH7;PCDH7             | NM_032456;NM_032457;NM_002589          | 1stExon;Body;1stExon               | chr4:30721Island  |
| cg08727867 | 1 |   | 37 | 21 | 15588349 | RBM11                         | NM_144770                              | TSS200                             | chr21:1558N_Shore |
| cg08728848 | 6 |   | 37 | 17 | 30437958 |                               |                                        |                                    |                   |
| cg08728848 |   | 3 | 37 | 17 | 30437958 |                               |                                        |                                    |                   |
| cg08751971 | 1 |   | 37 | 7  | 1.29E+08 | IRF5;IRF5;IRF5;IRF5;IRF5;IRF5 | NM_032643;NM_001098629;NM_001098629    | Body;Body;Body;Body;Body;Body;Body |                   |
| cg08753297 | 2 |   | 37 | 6  | 56716612 | DST;DST;DST;DST               | NM_001144771;NM_001144770;NM_001144770 | TSS200;5'UTR;1stExon;Body          |                   |
| cg08782158 | 4 |   | 37 | 2  | 927755   |                               |                                        |                                    |                   |
| cg08813539 |   | 1 | 37 | 10 | 29011452 |                               |                                        |                                    | chr10:2901Island  |
| cg08852245 | 1 |   | 37 | 4  | 1.75E+08 |                               |                                        |                                    | chr4:17513S_Shelf |
| cg08864035 |   | 3 | 37 | 1  | 1.14E+08 | HIPK1;HIPK1                   | NM_198268;NM_152696                    | TSS1500;TSS1500                    | chr1:11447N_Shore |
| cg08866633 | 1 |   | 37 | 13 | 1.14E+08 | LAMP1                         | NM_005561                              | Body                               |                   |
| cg08891883 | 1 |   | 37 | 4  | 8347266  |                               |                                        |                                    | chr4:83474N_Shore |
| cg08905496 | 3 |   | 37 | 1  | 1.65E+08 | RXRG;RXRG;RXRG;RXRG           | NM_001009598;NM_006917;NM_006917       | 5'UTR;5'UTR;1stExon;1stExon        |                   |
| cg08943292 | 1 |   | 37 | 4  | 40337370 | CHRNA9                        | NM_017581                              | TSS200                             |                   |
| cg08983429 | 1 |   | 37 | 16 | 3577455  | CLUAP1;CLUAP1                 | NM_015041;NM_024793                    | Body;Body                          |                   |
| cg08992729 |   | 1 | 37 | 6  | 32809425 | PSMB8;PSMB8                   | NM_004159;NM_148919                    | Body;Body                          | chr6:32811N_Shelf |
| cg09032973 | 1 |   | 37 | 5  | 1.4E+08  | PCDHA1;PCDHA1;PCDHA1          | NM_031410;NM_031411;NM_018900          | 1stExon;1stExon;1stExon            | chr5:14016Island  |

|            |   |    |    |          |                                     |                                        |                                                 |                   |
|------------|---|----|----|----------|-------------------------------------|----------------------------------------|-------------------------------------------------|-------------------|
| cg09119967 | 1 | 37 | 20 | 9494838  | C20orf103                           | NM_012261                              | TSS1500                                         | chr20:9495N_Shore |
| cg09214993 | 1 | 37 | 15 | 64673618 | KIAA0101;KIAA0101;KIAA0101;KIAA0101 | NM_001029989;NM_014736;NM_001029989    | 1stExon;1stExon;5'UTR;5'UTR                     |                   |
| cg09222892 | 1 | 37 | 1  | 25734099 | RHCE;RHCE;RHCE;RHCE                 | NM_138616;NM_138617;NM_138618          | Body;Body;Body;Body                             |                   |
| cg09272909 | 1 | 37 | 9  | 71736999 | TJP2                                | NM_001170414                           | 5'UTR                                           | chr9:71736Island  |
| cg09292409 | 2 | 37 | 16 | 15461083 |                                     |                                        |                                                 |                   |
| cg09334915 | 1 | 37 | 1  | 2.39E+08 |                                     |                                        |                                                 |                   |
| cg09343402 | 1 | 37 | 19 | 24216269 |                                     |                                        |                                                 |                   |
| cg09365557 | 1 | 37 | 17 | 59477564 | TBX2                                | NM_005994                              | 1stExon                                         | chr17:5947Island  |
| cg09413529 | 1 | 37 | 12 | 1.15E+08 | TBX3;TBX3                           | NM_005996;NM_016569                    | Body;Body                                       | chr12:1151Island  |
| cg09418673 | 3 | 37 | 11 | 76372128 | LRRC32;LRRC32                       | NM_001128922;NM_005512                 | Body;Body                                       |                   |
| cg09418673 | 4 | 37 | 11 | 76372128 | LRRC32;LRRC32                       | NM_001128922;NM_005512                 | Body;Body                                       |                   |
| cg09463211 | 1 | 37 | 15 | 99093248 |                                     |                                        |                                                 | chr15:9909S_Shore |
| cg09499421 | 1 | 37 | 16 | 31020735 | STX1B                               | NM_052874                              | Body                                            |                   |
| cg09507411 | 1 | 37 | 5  | 82395650 | XRCC4;XRCC4;XRCC4                   | NM_022550;NM_003401;NM_022406          | 5'UTR;5'UTR;5'UTR                               |                   |
| cg09600829 | 2 | 37 | 9  | 96216052 | FAM120A;FAM120AOS                   | NM_014612;NM_198841                    | Body;TSS200                                     | chr9:96213S_Shore |
| cg09653641 | 1 | 37 | 7  | 92455499 | CDK6;CDK6                           | NM_001259;NM_001145306                 | Body;Body                                       |                   |
| cg09672383 | 2 | 37 | 2  | 25390540 | POMC;POMC                           | NM_000939;NM_001035256                 | 5'UTR;5'UTR                                     | chr2:25391N_Shore |
| cg09672383 | 1 | 37 | 2  | 25390540 | POMC;POMC                           | NM_000939;NM_001035256                 | 5'UTR;5'UTR                                     | chr2:25391N_Shore |
| cg09717927 | 1 | 37 | 13 | 1.13E+08 |                                     |                                        |                                                 | chr13:1126N_Shore |
| cg09788029 | 3 | 37 | 12 | 1.03E+08 |                                     |                                        |                                                 |                   |
| cg09814034 | 1 | 37 | 20 | 44876346 | CDH22                               | NM_021248                              | Body                                            | chr20:4487S_Shore |
| cg09822136 | 1 | 37 | 5  | 14144123 | TRIO                                | NM_007118                              | Body                                            | chr5:14143Island  |
| cg09952395 | 1 | 37 | 11 | 63258712 | HRASLS5;HRASLS5;HRASLS5             | NM_001146728;NM_001146729;NM_001146729 | TSS200;TSS200;TSS200                            | chr11:6325Island  |
| cg10006235 | 2 | 37 | 11 | 49226370 | FOLH1;FOLH1                         | NM_004476;NM_001014986                 | Body;Body                                       | chr11:4922N_Shelf |
| cg10045446 | 1 | 37 | 7  | 32530734 | LSM5;LSM5;LSM5;LSM5                 | NM_001139499;NM_012322;NR_0244         | 5'UTR;TSS1500;TSS150                            | chr7:32529S_Shore |
| cg10045446 | 2 | 37 | 7  | 32530734 | LSM5;LSM5;LSM5;LSM5                 | NM_001139499;NM_012322;NR_0244         | 5'UTR;TSS1500;TSS150                            | chr7:32529S_Shore |
| cg10077985 | 1 | 37 | 10 | 833127   |                                     |                                        |                                                 |                   |
| cg10091458 | 3 | 37 | 9  | 1.17E+08 | KIF12                               | NM_138424                              | Body                                            | chr9:11686N_Shore |
| cg10128416 | 1 | 37 | 1  | 75198403 | TYW3;CRYZ;CRYZ;TYW3;TYW3;CRYZ;CRYZ  | NM_001162916;NM_001130042;NM_001162916 | TSS1500;5'UTR;5'UTR;TSS1500;TSS1500;5'UTR;5'UTR |                   |
| cg10159215 | 1 | 37 | 1  | 99470560 | LPPR5;LPPR5                         | NM_001010861;NM_001037317              | TSS200;TSS200                                   | chr1:99469Island  |
| cg10174031 | 1 | 37 | 16 | 31408898 | ITGAD                               | NM_005353                              | Body                                            |                   |
| cg10202874 | 1 | 37 | 16 | 32165225 | HERC2P4                             | NR_002827                              | TSS1500                                         |                   |
| cg10206440 | 4 | 37 | 1  | 16353594 | CLCNKA;CLCNKA                       | NM_001042704;NM_004070                 | Body;Body                                       |                   |
| cg10206440 | 1 | 37 | 1  | 16353594 | CLCNKA;CLCNKA                       | NM_001042704;NM_004070                 | Body;Body                                       |                   |
| cg10211414 | 1 | 37 | 1  | 8875053  | RERE;RERE                           | NM_012102;NM_001042681                 | 5'UTR;5'UTR                                     | chr1:88770N_Shore |
| cg10211414 | 1 | 37 | 1  | 8875053  | RERE;RERE                           | NM_012102;NM_001042681                 | 5'UTR;5'UTR                                     | chr1:88770N_Shore |
| cg10261325 | 1 | 37 | 10 | 29874759 | SVIL;SVIL                           | NM_021738;NM_003174                    | 5'UTR;5'UTR                                     |                   |
| cg10261325 | 1 | 37 | 10 | 29874759 | SVIL;SVIL                           | NM_021738;NM_003174                    | 5'UTR;5'UTR                                     |                   |
| cg10306485 | 7 | 37 | 13 | 1.15E+08 | RASA3                               | NM_007368                              | Body                                            | chr13:1148S_Shelf |
| cg10306485 | 3 | 37 | 13 | 1.15E+08 | RASA3                               | NM_007368                              | Body                                            | chr13:1148S_Shelf |
| cg10368533 | 1 | 37 | 12 | 22778127 | ETNK1;ETNK1                         | NM_001039481;NM_018638                 | 1stExon;1stExon                                 | chr12:2277Island  |
| cg10368935 | 1 | 37 | 10 | 18240316 | SLC39A12;SLC39A12                   | NM_001145195;NM_152725                 | TSS1500;TSS1500                                 |                   |
| cg10405239 | 1 | 37 | 17 | 26733360 | SLC46A1                             | NM_080669                              | TSS200                                          | chr17:2673Island  |
| cg10423227 | 1 | 37 | 2  | 64752200 | AFTPH;AFTPH;AFTPH                   | NM_203437;NM_001002243;NM_0176         | 5'UTR;5'UTR;5'UTR                               | chr2:64751S_Shore |
| cg10490795 | 1 | 37 | 5  | 1.5E+08  | SYNPO                               | NM_007286                              | Body                                            | chr5:15003N_Shore |
| cg10514235 | 1 | 37 | 4  | 15003844 |                                     |                                        |                                                 | chr4:15003Island  |
| cg10579818 | 1 | 37 | 19 | 34117242 | CHST8;CHST8                         | NM_001127895;NM_001127896              | 5'UTR;5'UTR                                     | chr19:3411S_Shelf |
| cg10596590 | 1 | 37 | 6  | 51814836 | PKHD1;PKHD1                         | NM_138694;NM_170724                    | Body;Body                                       |                   |
| cg10601972 | 1 | 37 | 3  | 12851576 | CAND2;CAND2                         | NM_001162499;NM_012298                 | Body;Body                                       | chr3:12851Island  |
| cg10607939 | 1 | 37 | 7  | 1.12E+08 | IFRD1;IFRD1                         | NM_001550;NM_001007245                 | Body;Body                                       | chr7:11209Island  |

|            |    |   |    |    |                                                          |                                        |                             |                   |
|------------|----|---|----|----|----------------------------------------------------------|----------------------------------------|-----------------------------|-------------------|
| cg10609068 | 4  |   | 37 | 12 | 45609265 ANO6;ANO6;PLEKHA9;ANO6                          | NM_001142680;NM_001142679;NM_C         | TSS1500;TSS1500;5'UT        | chr12:4560N_Shore |
| cg10609068 |    | 1 | 37 | 12 | 45609265 ANO6;ANO6;PLEKHA9;ANO6                          | NM_001142680;NM_001142679;NM_C         | TSS1500;TSS1500;5'UT        | chr12:4560N_Shore |
| cg10674754 | 4  |   | 37 | 4  | 8456019 C4orf23                                          | NM_152544                              | TSS200                      |                   |
| cg10674754 |    | 3 | 37 | 4  | 8456019 C4orf23                                          | NM_152544                              | TSS200                      |                   |
| cg10688514 | 1  |   | 37 | 10 | 48354852 ZNF488                                          | NM_153034                              | TSS1500                     | chr10:4835Island  |
| cg10703619 | 1  |   | 37 | 7  | 1.55E+08                                                 |                                        |                             |                   |
| cg10711996 | 1  |   | 37 | 10 | 32635917 EPC1;EPC1                                       | NM_025209;NM_025209                    | 5'UTR;1stExon               | chr10:3263Island  |
| cg10722444 |    | 1 | 37 | 13 | 1.13E+08                                                 |                                        |                             | chr13:1126Island  |
| cg10776643 | 1  |   | 37 | 14 | 71527576 PCNX                                            | NM_014982                              | Body                        |                   |
| cg10842913 | 1  |   | 37 | 12 | 1.26E+08                                                 |                                        |                             |                   |
| cg10843276 | 1  |   | 37 | 4  | 726697 PCGF3                                             | NM_006315                              | 5'UTR                       | chr4:72433S_Shore |
| cg10895973 |    | 1 | 37 | 17 | 14212636 HS3ST3B1                                        | NM_006041                              | Body                        | chr17:1421Island  |
| cg10902101 | 1  |   | 37 | 22 | 48899955 FAM19A5                                         | NM_001082967                           | Body                        | chr22:4889S_Shelf |
| cg10909154 |    | 1 | 37 | 16 | 2723619                                                  |                                        |                             | chr16:2722Island  |
| cg10932815 | 1  |   | 37 | 12 | 68294240                                                 |                                        |                             |                   |
| cg10966582 | 1  |   | 37 | 1  | 17085860 MST1P9                                          | NR_002729                              | Body                        | chr1:17085Island  |
| cg10966582 |    | 5 | 37 | 1  | 17085860 MST1P9                                          | NR_002729                              | Body                        | chr1:17085Island  |
| cg10988062 | 1  |   | 37 | 7  | 64023434 ZNF680;ZNF680;ZNF680;ZNF680                     | NM_001130022;NM_178558;NM_178558       | 1stExon;5'UTR;1stExon;5'UTR |                   |
| cg11005250 | 3  |   | 37 | 12 | 1.08E+08                                                 |                                        |                             | chr12:1082Island  |
| cg11084629 |    | 1 | 37 | 1  | 55230770 PARS2                                           | NM_152268                              | TSS1500                     | chr1:55229S_Shore |
| cg11104313 | 1  |   | 37 | 3  | 1.12E+08 TAGLN3;TAGLN3;TAGLN3                            | NM_013259;NM_001008272;NM_001008272    | TSS200;TSS200;TSS1500       |                   |
| cg11159141 |    | 1 | 37 | 3  | 11529333 ATG7;ATG7;ATG7                                  | NM_001136031;NM_001144912;NM_001144912 | Body;Body;Body              | chr3:11529N_Shore |
| cg11199172 | 1  |   | 37 | 17 | 46707338                                                 |                                        |                             | chr17:4671N_Shelf |
| cg11203397 | 1  |   | 37 | 13 | 46870454                                                 |                                        |                             |                   |
| cg11222065 | 1  |   | 37 | 6  | 33240468 VPS52;RPS18                                     | NM_022553;NM_022551                    | TSS1500;Body                | chr6:33239S_Shore |
| cg11273848 |    | 1 | 37 | 10 | 1.31E+08                                                 |                                        |                             | chr10:1305N_Shore |
| cg11303425 | 1  |   | 37 | 12 | 6798826 ZNF384;ZNF384;ZNF384;ZNF384;ZNF384;ZNF384;ZNF384 | NM_001039916;NM_001039920;NM_C         | TSS1500;TSS200;TSS200       | chr12:6798Island  |
| cg11322849 | 1  |   | 37 | 11 | 2182783 INS;INS-IGF2;INS-IGF2                            | NM_000207;NR_003512;NM_0010423         | TSS1500;TSS1500;TSS1500     |                   |
| cg11336643 | 1  |   | 37 | 12 | 1.24E+08 CCDC92                                          | NM_025140                              | 5'UTR                       |                   |
| cg11350208 |    | 1 | 37 | 2  | 1.33E+08                                                 |                                        |                             |                   |
| cg11386711 | 1  |   | 37 | 3  | 1.87E+08 ST6GAL1;ST6GAL1                                 | NM_173216;NM_173217                    | 5'UTR;5'UTR                 | chr3:18664S_Shelf |
| cg11461030 | 1  |   | 37 | 1  | 46932239                                                 |                                        |                             | chr1:46932Island  |
| cg11461302 | 1  |   | 37 | 22 | 38507451 BAIAP2L2                                        | NM_025045                              | TSS1500                     |                   |
| cg11498652 | 2  |   | 37 | 5  | 40834691 RPL37                                           | NM_000997                              | Body                        | chr5:40835N_Shore |
| cg11542394 | 2  |   | 37 | 15 | 1.01E+08 ALDH1A3                                         | NM_000693                              | TSS1500                     | chr15:1014N_Shore |
| cg11551464 |    | 3 | 37 | 8  | 49595738                                                 |                                        |                             |                   |
| cg11553116 | 1  |   | 37 | 6  | 2871823                                                  |                                        |                             | chr6:28756N_Shelf |
| cg11575929 | 1  |   | 37 | 6  | 28414894                                                 |                                        |                             |                   |
| cg11677722 |    | 1 | 37 | 19 | 39881393 MED29;PAF1                                      | NM_017592;NM_019088                    | TSS1500;Body                | chr19:3988Island  |
| cg11723795 | 1  |   | 37 | 14 | 91975931 SMEK1                                           | NM_032560                              | Body                        | chr14:9197Island  |
| cg11746846 | 3  |   | 37 | 18 | 3067337 MYOM1;MYOM1                                      | NM_019856;NM_003803                    | Body;Body                   | chr18:3067Island  |
| cg11746846 |    | 1 | 37 | 18 | 3067337 MYOM1;MYOM1                                      | NM_019856;NM_003803                    | Body;Body                   | chr18:3067Island  |
| cg11750736 | 1  |   | 37 | 17 | 10634140 TMEM220                                         | NM_001004313                           | TSS1500                     | chr17:1063S_Shore |
| cg11781564 | 1  |   | 37 | 5  | 73016764 RGNEF                                           | NM_001080479                           | Body                        |                   |
| cg11801727 |    | 1 | 37 | 1  | 2.29E+08                                                 |                                        |                             | chr1:22865Island  |
| cg11832722 | 1  |   | 37 | 18 | 28623060 DSC3;DSC3                                       | NM_001941;NM_024423                    | TSS1500;TSS1500             | chr18:2862Island  |
| cg11865413 | 15 |   | 37 | 10 | 72969054                                                 |                                        |                             | chr10:7297N_Shelf |
| cg11865413 |    | 9 | 37 | 10 | 72969054                                                 |                                        |                             | chr10:7297N_Shelf |
| cg11958128 | 1  |   | 37 | 12 | 3226445 TSPAN9;TSPAN9                                    | NM_001168320;NM_006675                 | 5'UTR;5'UTR                 |                   |
| cg12000587 | 1  |   | 37 | 17 | 30186630 C17orf79                                        | NM_018405                              | TSS1500                     | chr17:3018S_Shore |



|            |   |   |    |    |          |                                       |                                 |                       |                   |
|------------|---|---|----|----|----------|---------------------------------------|---------------------------------|-----------------------|-------------------|
| cg13462158 | 3 |   | 37 | 1  | 55522104 | PCSK9                                 | NM_174936                       | Body                  |                   |
| cg13473576 |   | 1 | 37 | 7  | 97601586 | MGC72080                              | NR_002822                       | Body                  | chr7:97601Island  |
| cg13488605 | 2 |   | 37 | 19 | 38908709 | RASGRP4;RASGRP4;RASGRP4;RASGRP4;RASGR | NM_001146205;NM_001146207;NM_C  | Body;Body;Body;Body;  | chr19:38908Island |
| cg13523386 | 1 |   | 37 | 4  | 71457838 | AMBN                                  | NM_016519                       | TSS200                |                   |
| cg13560904 |   | 1 | 37 | 1  | 1.5E+08  | OTUD7B                                | NM_020205                       | TSS200                | chr1:14998Island  |
| cg13565382 | 1 |   | 37 | 10 | 63628787 |                                       |                                 |                       |                   |
| cg13565382 |   | 4 | 37 | 10 | 63628787 |                                       |                                 |                       |                   |
| cg13568258 |   | 1 | 37 | 19 | 48823427 | CCDC114                               | NM_144577                       | TSS200                | chr19:4882N_Shore |
| cg13605988 | 1 |   | 37 | 15 | 45421612 | DUOX1;DUOX1;DUOXA1                    | NM_175940;NM_017434;NM_144565   | TSS1500;TSS1500;5'UT  | chr15:4542Island  |
| cg13612295 |   | 1 | 37 | 18 | 72124791 | FAM69C                                | NM_001044369                    | TSS1500               | chr18:7212S_Shore |
| cg13614440 | 2 |   | 37 | 17 | 76471012 | DNAH17                                | NM_173628                       | Body                  | chr17:7647N_Shore |
| cg13648344 | 1 |   | 37 | 9  | 36328161 |                                       |                                 |                       |                   |
| cg13663218 |   | 1 | 37 | 12 | 72666976 | LOC283392;TRHDE;LOC283392             | NR_026837;NM_013381;NR_026836   | Body;1stExon;Body     | chr12:7266Island  |
| cg13667739 | 1 |   | 37 | 14 | 1.06E+08 | CRIP2                                 | NM_001312                       | Body                  | chr14:1059Island  |
| cg13667739 |   | 1 | 37 | 14 | 1.06E+08 | CRIP2                                 | NM_001312                       | Body                  | chr14:1059Island  |
| cg13684188 |   | 1 | 37 | 9  | 1.35E+08 | TTF1                                  | NM_007344                       | TSS200                | chr9:13528Island  |
| cg13686622 |   | 1 | 37 | 13 | 41634589 | WBP4                                  | NM_007187                       | TSS1500               | chr13:4163Island  |
| cg13857186 |   | 1 | 37 | 9  | 1.16E+08 | C9orf43;POLE3;C9orf43;POLE3           | NM_152786;NR_027261;NM_152786;↑ | 5'UTR;TSS1500;1stExor | chr9:11617S_Shore |
| cg13861904 |   | 1 | 37 | 9  | 1.39E+08 | NOTCH1                                | NM_017617                       | Body                  | chr9:13942N_Shore |
| cg13892902 |   | 1 | 37 | 15 | 43478040 | CCNDBP1;CCNDBP1;CCNDBP1;CCNDBP1       | NM_037370;NM_012142;NR_027513;↑ | TSS200;Body;Body;Bod  | chr15:4347S_Shore |
| cg13896879 | 1 |   | 37 | 1  | 1.51E+08 | ARNT;ARNT;ARNT                        | NM_178427;NM_001668;NM_178426   | Body;Body;Body        |                   |
| cg13918350 | 1 |   | 37 | 7  | 1153507  | C7orf50;C7orf50;C7orf50               | NM_001134395;NM_032350;NM_0011  | Body;Body;Body        | chr7:11553N_Shore |
| cg13918350 |   | 1 | 37 | 7  | 1153507  | C7orf50;C7orf50;C7orf50               | NM_001134395;NM_032350;NM_0011  | Body;Body;Body        | chr7:11553N_Shore |
| cg13944505 |   | 1 | 37 | 1  | 1.87E+08 |                                       |                                 |                       |                   |
| cg13995006 | 1 |   | 37 | 8  | 1.19E+08 | MED30                                 | NM_080651                       | TSS200                | chr8:11853N_Shore |
| cg13999514 |   | 1 | 37 | 7  | 1.06E+08 | FLJ36031                              | NM_175884                       | TSS1500               | chr7:1063CS_Shore |
| cg14022105 | 2 |   | 37 | 11 | 78288793 |                                       |                                 |                       | chr11:7828S_Shelf |
| cg14022105 |   | 3 | 37 | 11 | 78288793 |                                       |                                 |                       | chr11:7828S_Shelf |
| cg14048880 |   | 1 | 37 | 9  | 1.39E+08 |                                       |                                 |                       | chr9:13906Island  |
| cg14056644 | 1 |   | 37 | 4  | 1.12E+08 | PITX2;PITX2                           | NM_153427;NM_153426             | TSS1500;TSS1500       | chr4:11156N_Shore |
| cg14097440 |   | 1 | 37 | 14 | 74251018 | C14orf43                              | NM_001043318                    | 5'UTR                 | chr14:7425N_Shelf |
| cg14109799 | 2 |   | 37 | 14 | 31495427 | AP4S1;STRN3;STRN3;STRN3;STRN3;AP4S1   | NM_007077;NM_014574;NM_014574;  | 5'UTR;1stExon;5'UTR;1 | chr14:3149Island  |
| cg14157578 |   | 1 | 37 | 9  | 1.11E+08 |                                       |                                 |                       |                   |
| cg14185808 |   | 1 | 37 | 2  | 1.06E+08 | MRPS9                                 | NM_182640                       | TSS1500               | chr2:10565N_Shore |
| cg14200609 |   | 1 | 37 | 12 | 94853950 | CCDC41;CCDC41;LOC144486               | NM_016122;NM_001042399;NR_0270  | TSS200;TSS200;Body    | chr12:9485Island  |
| cg14237674 | 1 |   | 37 | 17 | 43239170 | HEXIM2                                | NM_144608                       | 5'UTR                 | chr17:4323Island  |
| cg14249856 |   | 1 | 37 | 7  | 77167329 | PTPN12;PTPN12;PTPN12                  | NM_001131009;NM_001131008;NM_C  | TSS200;TSS200;Body    | chr7:77166Island  |
| cg14279842 | 2 |   | 37 | 14 | 50159788 | KLHDC1                                | NM_172193                       | TSS200                | chr14:5015Island  |
| cg14280905 |   | 5 | 37 | 9  | 1.36E+08 | ADAMTSL2;ADAMTSL2                     | NM_014694;NM_001145320          | Body;Body             | chr9:13642N_Shore |
| cg14294250 |   | 3 | 37 | 17 | 1957154  | HIC1                                  | NM_006497                       | TSS1500               | chr17:1952Island  |
| cg14314896 | 1 |   | 37 | 19 | 430690   | SHC2                                  | NM_012435                       | Body                  | chr19:4292S_Shore |
| cg14330460 |   | 4 | 37 | 6  | 1.69E+08 |                                       |                                 |                       |                   |
| cg14330460 |   | 7 | 37 | 6  | 1.69E+08 |                                       |                                 |                       |                   |
| cg14351127 | 1 |   | 37 | 9  | 1.03E+08 | INVS;INVS                             | NM_014425;NM_183245             | Body;Body             |                   |
| cg14361033 |   | 1 | 37 | 9  | 1.25E+08 | LHX6;LHX6                             | NM_199160;NM_014368             | Body;Body             | chr9:12498N_Shore |
| cg14397696 |   | 1 | 37 | 13 | 1.06E+08 |                                       |                                 |                       |                   |
| cg14414764 | 1 |   | 37 | 8  | 67741966 | SGK3;SGK3;SGK3                        | NM_170709;NM_001033578;NM_0132  | Body;Body;Body        |                   |
| cg14447152 | 1 |   | 37 | 9  | 1.4E+08  | COBRA1                                | NM_015456                       | Body                  | chr9:14014S_Shelf |
| cg14447152 |   | 2 | 37 | 9  | 1.4E+08  | COBRA1                                | NM_015456                       | Body                  | chr9:14014S_Shelf |
| cg14455170 | 1 |   | 37 | 13 | 42002398 |                                       |                                 |                       |                   |



|            |   |   |    |    |          |                                        |                                 |                         |                   |
|------------|---|---|----|----|----------|----------------------------------------|---------------------------------|-------------------------|-------------------|
| cg14466759 | 1 |   | 37 | 7  | 1.02E+08 | CUX1;CUX1;CUX1                         | NM_181500;NM_181552;NM_001913   | Body;Body;Body          |                   |
| cg14466759 |   | 1 | 37 | 7  | 1.02E+08 | CUX1;CUX1;CUX1                         | NM_181500;NM_181552;NM_001913   | Body;Body;Body          |                   |
| cg14467066 | 1 |   | 37 | 17 | 79419739 | BAHCC1                                 | NM_001080519                    | Body                    | chr17:7942N_Shore |
| cg14482093 |   | 1 | 37 | 8  | 22461488 | KIAA1967;C8orf58;KIAA1967              | NM_021174;NM_001013842;NM_1992  | TSS1500;3'UTR;TSS1500   | chr8:22462N_Shore |
| cg14540650 | 1 |   | 37 | 9  | 6683274  |                                        |                                 |                         | chr9:66808S_Shore |
| cg14543412 | 1 |   | 37 | 6  | 26224100 | HIST1H3E                               | NM_003532                       | TSS1500                 | chr6:26225N_Shore |
| cg14555127 |   | 3 | 37 | 7  | 35841578 | SEPT7;SEPT7                            | NM_001011553;NM_001788          | Body;Body               | chr7:3584C_Island |
| cg14616423 | 7 |   | 37 | 9  | 16315271 |                                        |                                 |                         |                   |
| cg14616423 |   | 1 | 37 | 9  | 16315271 |                                        |                                 |                         |                   |
| cg14639163 | 1 |   | 37 | 2  | 2.2E+08  | WNT6                                   | NM_006522                       | Body                    | chr2:21973Island  |
| cg14657159 |   | 2 | 37 | 12 | 56211136 | ORMDL2;SARNP;SARNP;SARNP               | NM_014182;NR_026723;NR_026722;N | TSS1500;Body;Body;Bo    | chr12:5621N_Shore |
| cg14710040 | 4 |   | 37 | 19 | 3985464  | EEF2                                   | NM_001961                       | TSS200                  | chr19:3984Island  |
| cg14737877 |   | 1 | 37 | 8  | 664783   | ERICH1                                 | NM_207332                       | Body                    | chr8:66399Island  |
| cg14780600 | 1 |   | 37 | 2  | 2.4E+08  | HDAC4                                  | NM_006037                       | 5'UTR                   |                   |
| cg14795305 |   | 2 | 37 | 7  | 1.51E+08 | SMARCD3;SMARCD3                        | NM_001003802;NM_003078          | TSS1500;TSS1500         | chr7:15097Island  |
| cg14834675 |   | 1 | 37 | 12 | 70083105 | BEST3;BEST3                            | NM_032735;NM_152439             | Body;TSS200             |                   |
| cg14857851 | 1 |   | 37 | 3  | 15115139 | ZFYVE20                                | NM_022340                       | 3'UTR                   | chr3:15116N_Shore |
| cg14858469 |   | 1 | 37 | 15 | 96874050 | NR2F2;NR2F2                            | NM_021005;NM_001145155          | TSS200;Body             | chr15:9687Island  |
| cg14866032 | 1 |   | 37 | 15 | 98195808 |                                        |                                 |                         | chr15:9819N_Shore |
| cg14870156 |   | 1 | 37 | 6  | 33048540 | HLA-DPB1                               | NM_002121                       | Body                    | chr6:33048Island  |
| cg14871601 | 1 |   | 37 | 7  | 64030039 |                                        |                                 |                         | chr7:64029Island  |
| cg14877741 |   | 1 | 37 | 9  | 1.26E+08 | RABGAP1                                | NM_012197                       | TSS200                  | chr9:1257C_Island |
| cg14938587 | 1 |   | 37 | 7  | 1.56E+08 |                                        |                                 |                         |                   |
| cg14965968 |   | 1 | 37 | 3  | 44803235 | KIF15;KIF15;KIAA1143                   | NM_020242;NM_020242;NM_020696   | 1stExon;5'UTR;TSS200    | chr3:44802Island  |
| cg15002362 | 1 |   | 37 | 6  | 1.3E+08  | LAMA2;LAMA2                            | NM_001079823;NM_000426          | Body;Body               |                   |
| cg15002362 |   | 1 | 37 | 6  | 1.3E+08  | LAMA2;LAMA2                            | NM_001079823;NM_000426          | Body;Body               |                   |
| cg15002580 | 1 |   | 37 | 8  | 98636815 |                                        |                                 |                         | chr8:98636Island  |
| cg15025054 |   | 2 | 37 | 1  | 2.13E+08 | TATDN3;NSL1;TATDN3;NSL1;TATDN3;TATDN3; | NM_001146171;NM_015471;NM_001C  | TSS1500;1stExon;TSS1500 | chr1:21296Island  |
| cg15109571 | 2 |   | 37 | 10 | 1.04E+08 | SUFU                                   | NM_016169                       | 1stExon                 | chr10:1042Island  |
| cg15119076 |   | 1 | 37 | 19 | 19976606 | ZNF253                                 | NM_021047                       | TSS200                  |                   |
| cg15140902 | 1 |   | 37 | 6  | 21667815 | FLJ22536                               | NR_015410                       | Body                    | chr6:21665S_Shore |
| cg15196058 | 1 |   | 37 | 4  | 1.31E+08 |                                        |                                 |                         |                   |
| cg15228928 | 2 |   | 37 | 13 | 1.13E+08 |                                        |                                 |                         | chr13:1127Island  |
| cg15330255 |   | 1 | 37 | 10 | 1.03E+08 | FBXW4                                  | NM_022039                       | TSS1500                 | chr10:1034S_Shore |
| cg15333277 | 2 |   | 37 | 8  | 41733931 | ANK1                                   | NM_001142446                    | Body                    | chr8:41733S_Shore |
| cg15347484 | 2 |   | 37 | 2  | 79515194 |                                        |                                 |                         |                   |
| cg15490897 |   | 1 | 37 | 1  | 55038020 | ACOT11;ACOT11                          | NM_015547;NM_147161             | Body;Body               |                   |
| cg15518950 | 1 |   | 37 | 5  | 72415770 | TMEM171;TMEM171                        | NM_001161342;NM_173490          | TSS1500;TSS1500         | chr5:72415Island  |
| cg15554438 | 1 |   | 37 | 11 | 92931280 | SLC36A4                                | NM_152313                       | TSS200                  | chr11:9293Island  |
| cg15590056 |   | 1 | 37 | 7  | 1.5E+08  |                                        |                                 |                         |                   |
| cg15595333 | 1 |   | 37 | 11 | 1.18E+08 |                                        |                                 |                         |                   |
| cg15602420 | 1 |   | 37 | 1  | 20205059 |                                        |                                 |                         | chr1:20208N_Shelf |
| cg15651394 |   | 1 | 37 | 2  | 36584981 | CRIM1                                  | NM_016441                       | Body                    | chr2:36584Island  |
| cg15681626 | 1 |   | 37 | 11 | 64739253 |                                        |                                 |                         | chr11:6473Island  |
| cg15685834 |   | 1 | 37 | 1  | 18970180 | PAX7;PAX7;PAX7                         | NM_013945;NM_002584;NM_0011352  | Body;Body;Body          | chr1:18969Island  |
| cg15705470 | 1 |   | 37 | 5  | 87972265 | LOC645323;LOC645323                    | NR_024383;NR_015436             | Body;Body               | chr5:87973N_Shore |
| cg15709065 |   | 1 | 37 | 3  | 1.34E+08 | AMOTL2                                 | NM_016201                       | 5'UTR                   | chr3:13409N_Shore |
| cg15714041 | 1 |   | 37 | 9  | 32384344 | ACO1                                   | NM_002197                       | TSS1500                 | chr9:32384N_Shore |
| cg15745910 |   | 1 | 37 | 13 | 1.13E+08 |                                        |                                 |                         |                   |
| cg15750986 | 1 |   | 37 | 7  | 98249103 | NPTX2                                  | NM_002523                       | Body                    | chr7:98245S_Shore |

|            |   |    |    |    |                                  |                                |                       |                   |
|------------|---|----|----|----|----------------------------------|--------------------------------|-----------------------|-------------------|
| cg15760840 | 1 |    | 37 | 7  | 27225222 HOXA11AS;HOXA11         | NR_002795;NM_005523            | Body;TSS1500          | chr7:27225Island  |
| cg15810744 |   | 1  | 37 | 11 | 67211300 CORO1B;CORO1B           | NM_001018070;NM_020441         | TSS200;TSS1500        |                   |
| cg15812873 |   | 1  | 37 | 16 | 28635015 SULT1A1                 | NM_177536                      | TSS200                | chr16:2863Island  |
| cg15840462 |   | 1  | 37 | 1  | 969744 AGRN                      | NM_198576                      | Body                  | chr1:96796Island  |
| cg15846886 | 1 |    | 37 | 17 | 79790116 FAM195B;FAM195B         | NM_207368;NM_001093767         | 5'UTR;5'UTR           | chr17:7979N_Shore |
| cg15877233 | 1 |    | 37 | 7  | 40611688 C7orf10                 | NM_024728                      | Body                  |                   |
| cg15892650 |   | 1  | 37 | 5  | 1.51E+08 ANXA6;ANXA6             | NM_001155;NM_004033            | Body;Body             |                   |
| cg15913680 |   | 3  | 37 | 11 | 72353343 PDE2A;PDE2A;PDE2A;PDE2A | NM_001143839;NR_026572;NM_0011 | 1stExon;Body;Body;Bo  | chr11:7235Island  |
| cg15917344 | 1 |    | 37 | 7  | 89975873 GTPBP10;GTPBP10         | NM_001042717;NM_033107         | TSS200;TSS200         | chr7:89975Island  |
| cg15959921 | 1 |    | 37 | 4  | 8702279                          |                                |                       |                   |
| cg15974085 | 1 |    | 37 | 18 | 71815641 C18orf55;FBXO15;FBXO15  | NM_014177;NM_152676;NM_001142  | TSS200;TSS1500;TSS15  | chr18:7181Island  |
| cg15974085 |   | 15 | 37 | 18 | 71815641 C18orf55;FBXO15;FBXO15  | NM_014177;NM_152676;NM_001142  | TSS200;TSS1500;TSS15  | chr18:7181Island  |
| cg15994467 | 1 |    | 37 | 12 | 52401523 GRASP                   | NM_181711                      | Body                  | chr12:5240Island  |
| cg16000637 |   | 1  | 37 | 7  | 1274142 UNCX                     | NM_001080461                   | Body                  | chr7:12691Island  |
| cg16001460 | 3 |    | 37 | 6  | 57181802 PRIM2                   | NM_000947                      | TSS1500               |                   |
| cg16001460 |   | 8  | 37 | 6  | 57181802 PRIM2                   | NM_000947                      | TSS1500               |                   |
| cg16009381 | 2 |    | 37 | 5  | 1.73E+08 BOD1;BOD1;BOD1;BOD1     | NM_138369;NM_138369;NM_001159  | 5'UTR;1stExon;5'UTR;1 | chr5:17304Island  |
| cg16009381 |   | 1  | 37 | 5  | 1.73E+08 BOD1;BOD1;BOD1;BOD1     | NM_138369;NM_138369;NM_001159  | 5'UTR;1stExon;5'UTR;1 | chr5:17304Island  |
| cg16013630 |   | 2  | 37 | 1  | 1406606 ATAD3B                   | NM_031921                      | TSS1500               | chr1:14068N_Shore |
| cg16026088 | 1 |    | 37 | 9  | 1.33E+08 TOR1B                   | NM_014506                      | TSS200                | chr9:13256N_Shore |
| cg16060163 |   | 3  | 37 | 17 | 80454814                         |                                |                       | chr17:8045Island  |
| cg16084014 |   | 1  | 37 | 7  | 1.15E+08 MDFIC;MDFIC             | NM_199072;NM_001166345         | Body;Body             |                   |
| cg16091269 | 1 |    | 37 | 3  | 1.97E+08                         |                                |                       | chr3:19718N_Shore |
| cg16091269 |   | 1  | 37 | 3  | 1.97E+08                         |                                |                       | chr3:19718N_Shore |
| cg16101346 |   | 1  | 37 | 1  | 1.87E+08 PTGS2                   | NM_000963                      | TSS1500               | chr1:18664S_Shore |
| cg16101636 | 1 |    | 37 | 6  | 29711438 LOC285830;LOC285830     | NR_026972;NR_026973            | Body;Body             |                   |
| cg16101636 |   | 1  | 37 | 6  | 29711438 LOC285830;LOC285830     | NR_026972;NR_026973            | Body;Body             |                   |
| cg16121685 |   | 5  | 37 | 1  | 1.62E+08 UHMK1                   | NM_175866                      | TSS200                | chr1:16246Island  |
| cg16143319 |   | 1  | 37 | 2  | 32230813 MEMO1;MEMO1             | NM_015955;NM_001137602         | Body;Body             | chr2:32234N_Shelf |
| cg16208269 |   | 1  | 37 | 3  | 45665937 LIMD1                   | NM_014240                      | Body                  |                   |
| cg16226310 | 1 |    | 37 | 5  | 843633 ZDHHC11                   | NM_024786                      | Body                  | chr5:84345Island  |
| cg16226310 |   | 1  | 37 | 5  | 843633 ZDHHC11                   | NM_024786                      | Body                  | chr5:84345Island  |
| cg16233210 | 1 |    | 37 | 3  | 1.72E+08 FNDC3B;FNDC3B           | NM_022763;NM_001135095         | 5'UTR;5'UTR           |                   |
| cg16234298 |   | 1  | 37 | 22 | 17091297 psiTPTE22               | NR_001591                      | Body                  | chr22:1709S_Shore |
| cg16271221 | 1 |    | 37 | 3  | 1.89E+08                         |                                |                       |                   |
| cg16315155 |   | 1  | 37 | 19 | 55249794 KIR2DL3;KIR2DL3         | NM_015868;NM_014511            | TSS200;TSS200         |                   |
| cg16348316 | 1 |    | 37 | 2  | 1.28E+08 PROC                    | NM_000312                      | Body                  | chr2:12818Island  |
| cg16349612 | 1 |    | 37 | 7  | 50849723 GRB10                   | NM_001001555                   | 5'UTR                 | chr7:50849N_Shore |
| cg16355305 |   | 1  | 37 | 12 | 65220152                         |                                |                       | chr12:6521S_Shore |
| cg16404784 | 1 |    | 37 | 14 | 38087605                         |                                |                       | chr14:3809N_Shelf |
| cg16410115 | 2 |    | 37 | 1  | 24240000 CNR2                    | NM_001841                      | TSS200                |                   |
| cg16410115 |   | 1  | 37 | 1  | 24240000 CNR2                    | NM_001841                      | TSS200                |                   |
| cg16459519 | 1 |    | 37 | 10 | 46970584 SYT15;SYT15;SYT15;SYT15 | NM_031912;NM_181519;NM_031912; | 1stExon;5'UTR;5'UTR;1 | chr10:4696Island  |
| cg16481280 | 1 |    | 37 | 6  | 32120955 PPT2;PRRT1;PPT2         | NM_005155;NM_030651;NM_138717  | TSS1500;TSS1500;TSS1  | chr6:32121N_Shore |
| cg16506566 | 1 |    | 37 | 5  | 10420680                         | 43530 NM_005885                | Body                  |                   |
| cg16517838 |   | 1  | 37 | 14 | 1.06E+08                         |                                |                       | chr14:1061S_Shore |
| cg16542426 |   | 1  | 37 | 15 | 23205622 WHAMML1                 | NR_003521                      | Body                  | chr15:2320N_Shelf |
| cg16573957 |   | 1  | 37 | 8  | 21970273                         |                                |                       | chr8:21966S_Shelf |
| cg16619071 | 1 |    | 37 | 19 | 52408324 ZNF649                  | NM_023074                      | TSS200                |                   |
| cg16626809 | 1 |    | 37 | 21 | 46825856 COL18A1                 | NM_130445                      | Body                  | chr21:4682Island  |

|            |    |    |    |    |          |                                         |                                                     |                                 |            |         |
|------------|----|----|----|----|----------|-----------------------------------------|-----------------------------------------------------|---------------------------------|------------|---------|
| cg16668042 | 1  |    | 37 | 5  | 1.32E+08 | HSPA4                                   | NM_002154                                           | Body                            | chr5:13238 | Island  |
| cg16668042 |    | 1  | 37 | 5  | 1.32E+08 | HSPA4                                   | NM_002154                                           | Body                            | chr5:13238 | Island  |
| cg16681830 |    | 1  | 37 | 20 | 62586920 | UCKL1AS;UCKL1                           | NR_027287;NM_017859                                 | Body;Body                       | chr20:6258 | Island  |
| cg16707641 |    | 1  | 37 | 2  | 1.75E+08 | WIPF1;WIPF1                             | NM_003387;NM_001077269                              | Body;Body                       |            |         |
| cg16730825 | 1  |    | 37 | 11 | 928439   | AP2A2                                   | NM_012305                                           | Body                            | chr11:9251 | S_Shelf |
| cg16788797 |    | 1  | 37 | 8  | 75132833 |                                         |                                                     |                                 |            |         |
| cg16790849 | 5  |    | 37 | 6  | 31829511 | NEU1                                    | NM_000434                                           | Body                            | chr6:31830 | N_Shore |
| cg16790849 |    | 3  | 37 | 6  | 31829511 | NEU1                                    | NM_000434                                           | Body                            | chr6:31830 | N_Shore |
| cg16837441 | 1  |    | 37 | 20 | 43935222 | MATN4;MATN4;MATN4;RBPJL                 | NM_003833;NM_030592;NM_030590;                      | 5'UTR;5'UTR;5'UTR;TSS           | chr20:4393 | Island  |
| cg16872520 |    | 1  | 37 | 11 | 72929124 | P2RY2;P2RY2;P2RY2                       | NM_176071;NM_176072;NM_002564                       | TSS1500;TSS1500;TSS1            | chr11:7292 | Island  |
| cg17001464 | 1  |    | 37 | 7  | 1.31E+08 | FLJ43663;FLJ43663                       | NR_015431;NR_024153                                 | Body;Body                       |            |         |
| cg17010112 |    | 1  | 37 | 4  | 77227123 | STBD1                                   | NM_003943                                           | TSS1500                         | chr4:7722  | N_Shore |
| cg17038667 | 1  |    | 37 | 11 | 69632883 | FGF3                                    | NM_005247                                           | Body                            | chr11:6963 | Island  |
| cg17049418 |    | 1  | 37 | 6  | 3722453  |                                         |                                                     |                                 |            |         |
| cg17278466 |    | 2  | 37 | 17 | 76798203 | USP36                                   | NM_025090                                           | Body                            | chr17:7679 | Island  |
| cg17310773 | 4  |    | 37 | 22 | 41215357 | SLC25A17;SLC25A17                       | NM_006358;NM_006358                                 | 1stExon;5'UTR                   | chr22:4121 | Island  |
| cg17310773 |    | 1  | 37 | 22 | 41215357 | SLC25A17;SLC25A17                       | NM_006358;NM_006358                                 | 1stExon;5'UTR                   | chr22:4121 | Island  |
| cg17319849 |    | 1  | 37 | 1  | 1.55E+08 | GBA;GBA;GBA;GBA                         | NM_001005749;NM_001005750;NM_001005751;NM_001005752 | TSS200;TSS200;TSS200;TSS200     |            |         |
| cg17330305 | 1  |    | 37 | 17 | 56834361 | PPM1E                                   | NM_014906                                           | Body                            | chr17:5683 | S_Shore |
| cg17330305 |    | 2  | 37 | 17 | 56834361 | PPM1E                                   | NM_014906                                           | Body                            | chr17:5683 | S_Shore |
| cg17351882 | 1  |    | 37 | 17 | 4692162  | GLTPD2                                  | NM_001014985                                        | TSS200                          | chr17:4692 | N_Shore |
| cg17392018 | 1  |    | 37 | 7  | 1.35E+08 | CALD1;CALD1;CALD1;CALD1;CALD1           | NM_033139;NM_033157;NM_033140;                      | Body;Body;Body;Body;Body        |            |         |
| cg17393572 |    | 1  | 37 | 5  | 1.76E+08 | HK3                                     | NM_002115                                           | TSS200                          |            |         |
| cg17419597 |    | 1  | 37 | 1  | 1.56E+08 | BGLAP                                   | NM_199173                                           | TSS1500                         | chr1:1562  | N_Shelf |
| cg17514665 | 1  |    | 37 | 17 | 1657533  | SERPINF2;SERPINF2;SERPINF2              | NM_000934;NM_001165921;NM_001165922                 | Body;Body;Body                  | chr17:1657 | Island  |
| cg17599471 | 1  |    | 37 | 1  | 25174745 |                                         |                                                     |                                 | chr1:2517  | Island  |
| cg17656474 |    | 1  | 37 | 12 | 176424   | IQSEC3                                  | NM_001170738                                        | 1stExon                         | chr12:1756 | S_Shore |
| cg17690515 |    | 2  | 37 | 19 | 1360278  | MUM1;MUM1                               | NR_024247;NM_032853                                 | Body;Body                       | chr19:1360 | Island  |
| cg17745251 | 11 |    | 37 | 10 | 21806139 | C10orf140                               | NM_207371                                           | Body                            | chr10:2180 | Island  |
| cg17745251 |    | 7  | 37 | 10 | 21806139 | C10orf140                               | NM_207371                                           | Body                            | chr10:2180 | Island  |
| cg17747332 | 1  |    | 37 | 19 | 11071239 | SMARCA4;SMARCA4;SMARCA4                 | NM_003072;NM_001128849;NM_001128850                 | TSS1500;TSS1500;TSS1            | chr19:1107 | Island  |
| cg17749356 |    | 1  | 37 | 2  | 1.19E+08 | CCDC93                                  | NM_019044                                           | Body                            |            |         |
| cg17775382 | 1  |    | 37 | 5  | 1584233  | SDHAP3                                  | NR_003263                                           | Body                            |            |         |
| cg17782025 | 1  |    | 37 | 3  | 23958698 | NKIRAS1;RPL15                           | NM_020345;NM_002948                                 | TSS200;5'UTR                    | chr3:2395  | Island  |
| cg17794241 | 1  |    | 37 | 15 | 74658653 | CYP11A1;CYP11A1                         | NM_000781;NM_001099773                              | Body;TSS200                     | chr15:7465 | S_Shore |
| cg17815035 |    | 1  | 37 | 18 | 54790380 |                                         |                                                     |                                 | chr18:5478 | S_Shore |
| cg17877237 | 2  |    | 37 | 13 | 32497491 | EEF1DP3                                 | NR_027062                                           | Body                            |            |         |
| cg17892069 | 2  |    | 37 | 7  | 70061616 | AUTS2;AUTS2                             | NM_015570;NM_001127231                              | Body;Body                       | chr7:7006  | S_Shore |
| cg17892069 |    | 3  | 37 | 7  | 70061616 | AUTS2;AUTS2                             | NM_015570;NM_001127231                              | Body;Body                       | chr7:7006  | S_Shore |
| cg17897445 |    | 1  | 37 | 8  | 7537473  |                                         |                                                     |                                 | chr8:7537  | N_Shore |
| cg17918201 | 1  |    | 37 | 10 | 27150106 | ABI1;ABI1;ABI1;ABI1                     | NM_005470;NM_001012752;NM_001012753;NM_001012754    | TSS200;TSS200;TSS200            | chr10:2714 | Island  |
| cg17956079 | 10 |    | 37 | 11 | 73358572 | PLEKHB1;PLEKHB1;PLEKHB1;PLEKHB1;PLEKHB1 | NM_001130035;NM_001130036;NM_001130037              | TSS200;TSS1500;TSS200;Body;Body |            |         |
| cg17956079 |    | 4  | 37 | 11 | 73358572 | PLEKHB1;PLEKHB1;PLEKHB1;PLEKHB1;PLEKHB1 | NM_001130035;NM_001130036;NM_001130037              | TSS200;TSS1500;TSS200;Body;Body |            |         |
| cg17987505 |    | 1  | 37 | 5  | 1.79E+08 | SQSTM1;SQSTM1                           | NM_001142298;NM_001142299                           | 5'UTR;5'UTR                     | chr5:1792  | N_Shore |
| cg18007959 | 1  |    | 37 | 5  | 1.54E+08 |                                         |                                                     |                                 | chr5:1538  | S_Shore |
| cg18056133 | 1  |    | 37 | 11 | 60609408 | CCDC86                                  | NM_024098                                           | TSS200                          | chr11:6060 | Island  |
| cg18099523 |    | 1  | 37 | 6  | 1.46E+08 | SHPRH;SHPRH                             | NM_173082;NM_001042683                              | TSS1500;TSS1500                 | chr6:1462  | Island  |
| cg18111500 | 3  |    | 37 | 14 | 61655727 |                                         |                                                     |                                 |            |         |
| cg18111500 |    | 10 | 37 | 14 | 61655727 |                                         |                                                     |                                 |            |         |
| cg18193219 |    | 1  | 37 | 3  | 53164697 | RFT1                                    | NM_052859                                           | TSS1500                         | chr3:5316  | Island  |

|            |   |    |    |          |                                  |                                 |                              |                   |
|------------|---|----|----|----------|----------------------------------|---------------------------------|------------------------------|-------------------|
| cg18207011 | 1 | 37 | 14 | 68861095 | RAD51L1;RAD51L1;RAD51L1          | NM_133509;NM_002877;NM_133510   | Body;Body;Body               |                   |
| cg18217175 | 2 | 37 | 1  | 18967020 | PAX7;PAX7;PAX7                   | NM_013945;NM_002584;NM_0011352  | Body;Body;Body               | chr1:18967N_Shore |
| cg18217175 | 1 | 37 | 1  | 18967020 | PAX7;PAX7;PAX7                   | NM_013945;NM_002584;NM_0011352  | Body;Body;Body               | chr1:18967N_Shore |
| cg18220799 | 1 | 37 | 18 | 44099340 | LOXHD1;LOXHD1;LOXHD1             | NM_001145473;NM_144612;NM_0011  | TSS1500;Body;Body            |                   |
| cg18239858 | 1 | 37 | 7  | 1.02E+08 | CUX1;CUX1;CUX1                   | NM_181500;NM_181552;NM_001913   | Body;Body;Body               |                   |
| cg18325160 | 1 | 37 | 3  | 1.93E+08 | OPA1;OPA1;OPA1;OPA1;OPA1;OPA1;OP | NM_130836;NM_130831;NM_130837;  | 5'UTR;5'UTR;5'UTR;1stl       | chr3:19331Island  |
| cg18337963 | 1 | 37 | 11 | 46383209 | DGKZ;DGKZ;DGKZ;DGKZ;DGKZ         | NM_001105540;NM_201533;NM_00111 | 1stExon;Body;5'UTR;Body;Body |                   |
| cg18391209 | 1 | 37 | 1  | 2.24E+08 | CAPN8                            | NM_001143962                    | Body                         | chr1:22374S_Shelf |
| cg18415822 | 1 | 37 | 7  | 1.56E+08 |                                  |                                 |                              | chr7:15585S_Shore |
| cg18452149 | 1 | 37 | 3  | 1.08E+08 | KIAA1524;DZIP3;KIAA1524          | NM_020890;NM_014648;NM_020890   | 5'UTR;TSS200;1stExon         | chr3:10830Island  |
| cg18460938 | 1 | 37 | 15 | 86842630 | AGBL1                            | NM_152336                       | Body                         |                   |
| cg18496140 | 1 | 37 | 11 | 44286375 | ALX4                             | NM_021926                       | 3'UTR                        |                   |
| cg18501555 | 1 | 37 | 4  | 1.12E+08 | PITX2;PITX2                      | NM_153427;NM_153426             | 5'UTR;5'UTR                  | chr4:11155Island  |
| cg18561676 | 2 | 37 | 1  | 1.49E+08 |                                  |                                 |                              | chr1:14885Island  |
| cg18561676 | 4 | 37 | 1  | 1.49E+08 |                                  |                                 |                              | chr1:14885Island  |
| cg18580296 | 1 | 37 | 7  | 15726411 | MEOX2                            | NM_005924                       | TSS200                       |                   |
| cg18580296 | 2 | 37 | 7  | 15726411 | MEOX2                            | NM_005924                       | TSS200                       |                   |
| cg18633379 | 1 | 37 | 18 | 59855274 | PIGN;PIGN;KIAA1468               | NM_012327;NM_176787;NM_020854   | TSS1500;TSS1500;Body         | chr18:5985S_Shore |
| cg18633561 | 1 | 37 | 7  | 1.22E+08 | FEZF1;FEZF1                      | NM_001160264;NM_001024613       | Body;Body                    | chr7:12194N_Shore |
| cg18676488 | 1 | 37 | 5  | 70848105 | BDP1                             | NM_018429                       | Body                         |                   |
| cg18676488 | 2 | 37 | 5  | 70848105 | BDP1                             | NM_018429                       | Body                         |                   |
| cg18686165 | 1 | 37 | 3  | 57200492 | IL17RD                           | NM_017563                       | TSS1500                      | chr3:57198S_Shore |
| cg18700813 | 3 | 37 | 14 | 1.03E+08 | RAGE                             | NM_014226                       | Body                         |                   |
| cg18710412 | 1 | 37 | 5  | 90654191 |                                  |                                 |                              |                   |
| cg18724069 | 1 | 37 | 5  | 39721760 |                                  |                                 |                              | chr5:39721Island  |
| cg18762036 | 1 | 37 | 2  | 1.08E+08 |                                  |                                 |                              |                   |
| cg18779296 | 1 | 37 | 4  | 41878119 |                                  |                                 |                              | chr4:41880N_Shelf |
| cg18855674 | 1 | 37 | 8  | 72469553 |                                  |                                 |                              | chr8:72468Island  |
| cg18862888 | 4 | 37 | 10 | 31346162 |                                  |                                 |                              |                   |
| cg18902057 | 1 | 37 | 16 | 88636444 | ZC3H18                           | NM_144604                       | TSS1500                      | chr16:8863Island  |
| cg18927185 | 1 | 37 | 6  | 33091634 | HLA-DPB2                         | NR_001435                       | Body                         |                   |
| cg18954388 | 1 | 37 | 11 | 20621495 | SLC6A5                           | NM_004211                       | Body                         | chr11:2062N_Shore |
| cg19037304 | 2 | 37 | 7  | 19812760 | TMEM196                          | NM_152774                       | TSS1500                      | chr7:19812Island  |
| cg19132477 | 1 | 37 | 3  | 8484313  |                                  |                                 |                              |                   |
| cg19132477 | 1 | 37 | 3  | 8484313  |                                  |                                 |                              |                   |
| cg19154754 | 1 | 37 | 11 | 48977527 |                                  |                                 |                              |                   |
| cg19157696 | 1 | 37 | 11 | 27384984 | CCDC34;CCDC34                    | NM_080654;NM_030771             | TSS200;TSS200                | chr11:2738S_Shore |
| cg19190016 | 1 | 37 | 17 | 81025684 |                                  |                                 |                              | chr17:8102S_Shore |
| cg19207486 | 1 | 37 | 19 | 22323107 |                                  |                                 |                              | chr19:2232S_Shelf |
| cg19227053 | 1 | 37 | 20 | 60116795 | CDH4                             | NM_001794                       | Body                         | chr20:6011N_Shelf |
| cg19265948 | 2 | 37 | 12 | 23229286 |                                  |                                 |                              |                   |
| cg19265948 | 1 | 37 | 12 | 23229286 |                                  |                                 |                              |                   |
| cg19327615 | 1 | 37 | 20 | 19955436 | RIN2                             | NM_018993                       | Body                         | chr20:1995N_Shore |
| cg19327615 | 1 | 37 | 20 | 19955436 | RIN2                             | NM_018993                       | Body                         | chr20:1995N_Shore |
| cg19380675 | 1 | 37 | 22 | 32808489 | C22orf28                         | NM_014306                       | TSS1500                      | chr22:3280S_Shore |
| cg19409687 | 1 | 37 | 11 | 65682960 |                                  |                                 |                              | chr11:6568N_Shelf |
| cg19441646 | 1 | 37 | 14 | 1.03E+08 | RAGE                             | NM_014226                       | 3'UTR                        | chr14:1026Island  |
| cg19448318 | 2 | 37 | 6  | 30698784 | FLOT1                            | NM_005803                       | Body                         |                   |
| cg19469087 | 1 | 37 | 7  | 98556941 | TRRAP                            | NM_003496                       | Body                         | chr7:98552S_Shelf |
| cg19480274 | 1 | 37 | 20 | 37098327 |                                  |                                 |                              | chr20:3710N_Shelf |

|            |   |    |    |          |                                       |                                |                                           |             |         |
|------------|---|----|----|----------|---------------------------------------|--------------------------------|-------------------------------------------|-------------|---------|
| cg19484381 | 1 | 37 | 6  | 28890673 | TRIM27                                | NM_006510                      | Body                                      | chr6:28890  | N_Shore |
| cg19488906 | 1 | 37 | 6  | 1.62E+08 | AGPAT4                                | NM_020133                      | 5'UTR                                     |             |         |
| cg19513744 | 2 | 37 | 3  | 56836209 | ARHGEF3;ARHGEF3                       | NM_001128615;NM_019555         | Body;TSS1500                              | chr3:56835  | Island  |
| cg19514542 | 1 | 37 | 10 | 1.26E+08 | CPMX2                                 | NM_198148                      | Body                                      | chr10:1256  | N_Shelf |
| cg19559392 | 7 | 37 | 2  | 39103372 | MORN2;DHX57                           | NM_001145450;NM_198963         | 5'UTR;TSS1500                             | chr2:391025 | _Shore  |
| cg19562312 | 1 | 37 | 10 | 44069847 | ZNF239;ZNF239;ZNF239                  | NM_001099284;NM_001099282;NM_C | 5'UTR;5'UTR;5'UTR                         | chr10:4406  | Island  |
| cg19625088 | 1 | 37 | 5  | 87976156 | LOC645323                             | NR_015436                      | Body                                      | chr5:87976  | Island  |
| cg19627869 | 1 | 37 | 12 | 56391069 | SUOX;SUOX;SUOX;SUOX;SUOX              | NM_001032386;NM_001032387;NM_C | 5'UTR;1stExon;1stExon;5'UTR;5'UTR;1stExon |             |         |
| cg19693446 | 1 | 37 | 14 | 1.02E+08 |                                       |                                |                                           |             |         |
| cg19749898 | 1 | 37 | 11 | 1712765  | HCCA2                                 | NM_053005                      | Body                                      | chr11:1715  | N_Shelf |
| cg19777001 | 1 | 37 | 14 | 1.03E+08 | RCOR1                                 | NM_015156                      | Body                                      |             |         |
| cg19837938 | 1 | 37 | 5  | 23507458 | PRDM9                                 | NM_020227                      | TSS1500                                   |             |         |
| cg19837938 | 2 | 37 | 5  | 23507458 | PRDM9                                 | NM_020227                      | TSS1500                                   |             |         |
| cg19852211 | 1 | 37 | 5  | 1.4E+08  | PCDHA2;PCDHA1;PCDHA1;PCDHA4;PCDHA3;PC | NM_018905;NM_031411;NM_018900; | Body;Body;Body;1stEx                      | chr5:14018  | Island  |
| cg19852211 | 1 | 37 | 5  | 1.4E+08  | PCDHA2;PCDHA1;PCDHA1;PCDHA4;PCDHA3;PC | NM_018905;NM_031411;NM_018900; | Body;Body;Body;1stEx                      | chr5:14018  | Island  |
| cg19855573 | 2 | 37 | 1  | 1.52E+08 | FLG                                   | NM_002016                      | TSS200                                    |             |         |
| cg19865375 | 1 | 37 | 7  | 86629801 | KIAA1324L;KIAA1324L                   | NM_001142749;NR_030672         | Body;Body                                 |             |         |
| cg19875976 | 1 | 37 | 9  | 1.14E+08 | KIAA0368                              | NM_001080398                   | Body                                      | chr9:11424  | Island  |
| cg19875976 | 1 | 37 | 9  | 1.14E+08 | KIAA0368                              | NM_001080398                   | Body                                      | chr9:11424  | Island  |
| cg19991948 | 1 | 37 | 10 | 1.21E+08 | TIAL1;TIAL1                           | NM_001033925;NM_003252         | 3'UTR;3'UTR                               |             |         |
| cg19998654 | 1 | 37 | 2  | 37458983 | CEBPZ;C2orf56;C2orf56                 | NM_005760;NM_144736;NM_0010836 | TSS1500;Body;Body                         | chr2:37458  | Island  |
| cg20059151 | 1 | 37 | 1  | 95286311 | SLC44A3;SLC44A3                       | NM_152369;NM_001114106         | 5'UTR;Body                                | chr1:95285  | Island  |
| cg20069765 | 1 | 37 | 6  | 33036464 | HLA-DPA1                              | NM_033554                      | Body                                      |             |         |
| cg20081364 | 1 | 37 | 20 | 13202225 | ISM1                                  | NM_080826                      | TSS200                                    | chr20:1320  | Island  |
| cg20155875 | 1 | 37 | 17 | 66452567 | WIPI1                                 | NM_017983                      | Body                                      | chr17:6645  | N_Shore |
| cg20162076 | 3 | 37 | 6  | 6588089  | LY86;LOC285780                        | NM_004271;NR_026970            | TSS1500;Body                              |             |         |
| cg20162076 | 5 | 37 | 6  | 6588089  | LY86;LOC285780                        | NM_004271;NR_026970            | TSS1500;Body                              |             |         |
| cg20172795 | 1 | 37 | 6  | 1.27E+08 | RSPO3                                 | NM_032784                      | Body                                      | chr6:12744  | N_Shore |
| cg20183094 | 4 | 37 | 7  | 1.22E+08 |                                       |                                |                                           | chr7:12195  | Island  |
| cg20200361 | 6 | 37 | 2  | 43775888 | THADA;THADA                           | NM_022065;NM_001083953         | Body;Body                                 |             |         |
| cg20268522 | 2 | 37 | 11 | 1.13E+08 | NCAM1;NCAM1;NCAM1;NCAM1;NCAM1;NCAM1   | NM_001076682;NM_001076682;NM_0 | 1stExon;5'UTR;5'UTR;1                     | chr11:1128  | N_Shore |
| cg20274430 | 1 | 37 | 22 | 41075992 | MCHR1                                 | NM_005297                      | Body                                      |             |         |
| cg20294319 | 1 | 37 | 13 | 47253842 | LRCH1;LRCH1;LRCH1                     | NM_015116;NM_001164213;NM_0011 | Body;Body;Body                            |             |         |
| cg20319405 | 1 | 37 | 11 | 10830230 | EIF4G2;EIF4G2                         | NM_001418;NM_001042559         | 5'UTR;5'UTR                               | chr11:1082  | Island  |
| cg20327784 | 1 | 37 | 17 | 73703307 | SAP30BP                               | NM_013260                      | 3'UTR                                     |             |         |
| cg20327784 | 1 | 37 | 17 | 73703307 | SAP30BP                               | NM_013260                      | 3'UTR                                     |             |         |
| cg20458353 | 2 | 37 | 7  | 21260293 |                                       |                                |                                           |             |         |
| cg20500836 | 1 | 37 | 17 | 78818645 | RPTOR;RPTOR                           | NM_001163034;NM_020761         | Body;Body                                 | chr17:7881  | Island  |
| cg20532937 | 1 | 37 | 10 | 13748985 | FRMD4A                                | NM_018027                      | Body                                      |             |         |
| cg20555922 | 1 | 37 | 20 | 33880266 | FAM83C                                | NM_178468                      | TSS200                                    | chr20:33875 | _Shore  |
| cg20587808 | 1 | 37 | 3  | 1.84E+08 |                                       |                                |                                           | chr3:18432  | Island  |
| cg20593868 | 1 | 37 | 20 | 62588672 | UCKL1;ZNF512B                         | NM_017859;NM_020713            | TSS1500;3'UTR                             | chr20:62585 | _Shore  |
| cg20593868 | 1 | 37 | 20 | 62588672 | UCKL1;ZNF512B                         | NM_017859;NM_020713            | TSS1500;3'UTR                             | chr20:62585 | _Shore  |
| cg20684251 | 3 | 37 | 19 | 51840554 | VSIG10L                               | NM_001163922                   | Body                                      | chr19:5184  | N_Shore |
| cg20684251 | 1 | 37 | 19 | 51840554 | VSIG10L                               | NM_001163922                   | Body                                      | chr19:5184  | N_Shore |
| cg20707630 | 1 | 37 | 15 | 25018449 |                                       |                                |                                           | chr15:2501  | Island  |
| cg20743744 | 1 | 37 | 4  | 1243849  | C4orf42;CTBP1;CTBP1                   | NM_052861;NM_001328;NM_0010126 | TSS1500;TSS1500;TSS1                      | chr4:12414  | Island  |
| cg20888142 | 1 | 37 | 3  | 12045662 | SYN2;SYN2                             | NM_003178;NM_133625            | TSS200;TSS200                             | chr3:12045  | Island  |
| cg20914725 | 1 | 37 | 2  | 74776831 | LOXL3                                 | NM_032603                      | Body                                      | chr2:74776  | Island  |
| cg21000072 | 1 | 37 | 1  | 3567408  | WDR8                                  | NM_017818                      | TSS1500                                   | chr1:35664  | Island  |



|            |   |    |    |          |                                     |                                                  |                                          |
|------------|---|----|----|----------|-------------------------------------|--------------------------------------------------|------------------------------------------|
| cg22510362 | 1 | 37 | 16 | 87251839 |                                     |                                                  | chr16:8725Island                         |
| cg22630628 | 1 | 37 | 10 | 73337125 | CDH23;CDH23                         | NM_052836;NM_022124                              | Body;Body                                |
| cg22657457 | 1 | 37 | 5  | 75469969 | SV2C                                | NM_014979                                        | Body chr5:75469Island                    |
| cg22730967 | 1 | 37 | 1  | 2.03E+08 | ADORA1;ADORA1                       | NM_001048230;NM_000674                           | 5'UTR;5'UTR chr1:20309Island             |
| cg22730967 | 1 | 37 | 1  | 2.03E+08 | ADORA1;ADORA1                       | NM_001048230;NM_000674                           | 5'UTR;5'UTR chr1:20309Island             |
| cg22791936 | 1 | 37 | 6  | 1.37E+08 | SLC35D3;SLC35D3                     | NM_001008783;NM_001008783                        | 1stExon;5'UTR chr6:13724Island           |
| cg22819135 | 1 | 37 | 5  | 41920822 | C5orf51                             | NM_175921                                        | 3'UTR                                    |
| cg22821289 | 1 | 37 | 11 | 1.16E+08 |                                     |                                                  |                                          |
| cg22827060 | 1 | 37 | 13 | 30424359 | UBL3;UBL3                           | NM_007106;NM_007106                              | 1stExon;5'UTR chr13:3042Island           |
| cg22836434 | 1 | 37 | 11 | 86014570 | C11orf73;C11orf73;C11orf73;C11orf73 | NM_016401;NR_024597;NR_024596;N                  | Body;Body;Body;Body                      |
| cg22856949 | 1 | 37 | 10 | 1.27E+08 | C10orf137                           | NM_015608                                        | TSS200 chr10:1274Island                  |
| cg22877380 | 1 | 37 | 2  | 1.32E+08 | ARHGFE4;ARHGFE4                     | NM_032995;NM_015320                              | 3'UTR;3'UTR                              |
| cg22963777 | 1 | 37 | 20 | 34115350 | C20orf173;C20orf173                 | NM_001145350;NR_026933                           | 3'UTR;Body                               |
| cg23013894 | 1 | 37 | 5  | 5025912  |                                     |                                                  |                                          |
| cg23067355 | 1 | 37 | 6  | 1.25E+08 |                                     |                                                  | chr6:12542S_Shelf                        |
| cg23078194 | 1 | 37 | 6  | 27661566 |                                     |                                                  |                                          |
| cg23146197 | 1 | 37 | 12 | 66271002 | HMGA2;HMGA2                         | NM_003484;NM_003483                              | Body;Body                                |
| cg23191118 | 1 | 37 | 8  | 1.46E+08 | SCRT1                               | NM_031309                                        | TSS1500 chr8:14555Island                 |
| cg23210118 | 1 | 37 | 10 | 95653378 | TMEM20;TMEM20                       | NM_153226;NM_001134658                           | TSS1500;TSS1500 chr10:9565N_Shore        |
| cg23226134 | 5 | 37 | 1  | 11866389 | CLCN6;CLCN6;CLCN6;CLCN6;MTHFR       | NM_001286;NM_021737;NM_021735;                   | 1stExon;1stExon;1stExon chr1:11865Island |
| cg23232056 | 1 | 37 | 1  | 1.21E+08 |                                     |                                                  |                                          |
| cg23239690 | 3 | 37 | 10 | 1.32E+08 | MGMT                                | NM_002412                                        | Body                                     |
| cg23239690 | 1 | 37 | 10 | 1.32E+08 | MGMT                                | NM_002412                                        | Body                                     |
| cg23275972 | 1 | 37 | 7  | 1.57E+08 |                                     |                                                  |                                          |
| cg23283362 | 1 | 37 | 1  | 45263371 |                                     |                                                  | chr1:45265N_Shelf                        |
| cg23285761 | 2 | 37 | 8  | 38089462 | DDHD2;DDHD2;DDHD2                   | NM_015214;NM_001164234;NM_00115'UTR;5'UTR;TSS200 | chr8:38088Island                         |
| cg23350744 | 1 | 37 | 5  | 1.22E+08 |                                     |                                                  | chr5:12242N_Shelf                        |
| cg23369529 | 1 | 37 | 1  | 68149989 | GADD45A                             | NM_001924                                        | TSS1500 chr1:68150N_Shore                |
| cg23442853 | 1 | 37 | 3  | 1.22E+08 | PARP15;PARP15                       | NM_001113523;NM_001113523                        | 5'UTR;1stExon chr3:12229N_Shore          |
| cg23465289 | 1 | 37 | 5  | 54909384 |                                     |                                                  |                                          |
| cg23509665 | 2 | 37 | 7  | 1.58E+08 | PTPRN2;PTPRN2;PTPRN2                | NM_002847;NM_130842;NM_130843                    | Body;Body;Body                           |
| cg23517116 | 1 | 37 | 8  | 65499841 |                                     |                                                  | chr8:65499Island                         |
| cg23574427 | 1 | 37 | 4  | 1.23E+08 | BBS7;CCNA2                          | NM_176824;NM_001237                              | 3'UTR;TSS1500 chr4:12274S_Shore          |
| cg23645639 | 1 | 37 | 19 | 21203403 | ZNF430                              | NM_025189                                        | TSS200                                   |
| cg23660155 | 1 | 37 | 1  | 22915626 | EPHA8;EPHA8                         | NM_001006943;NM_020526                           | Body;Body                                |
| cg23692620 | 1 | 37 | 19 | 19971862 |                                     |                                                  | chr19:1997Island                         |
| cg23730260 | 1 | 37 | 11 | 8290409  |                                     |                                                  | chr11:8289S_Shore                        |
| cg23777173 | 2 | 37 | 12 | 1.33E+08 | GALNT9                              | NM_001122636                                     | Body chr12:1326S_Shore                   |
| cg23802518 | 1 | 37 | 10 | 80827482 | ZMIZ1;LOC283050;LOC283050;LOC283050 | NM_020338;NR_024431;NR_024429;N                  | TSS1500;TSS1500;TSS1500 chr10:8082Island |
| cg23813156 | 1 | 37 | 20 | 47935243 |                                     |                                                  | chr20:4793Island                         |
| cg23837438 | 1 | 37 | 10 | 1.35E+08 |                                     |                                                  | chr10:1351Island                         |
| cg23951961 | 1 | 37 | 4  | 42154912 | BEND4;BEND4                         | NM_207406;NM_001159547                           | TSS200;TSS200 chr4:42152Island           |
| cg23970785 | 1 | 37 | 16 | 11036526 | DEXI                                | NM_014015                                        | TSS1500 chr16:1103Island                 |
| cg24030735 | 1 | 37 | 17 | 10533089 | MYH3                                | NM_002470                                        | Body                                     |
| cg24099067 | 1 | 37 | 6  | 26758750 |                                     |                                                  |                                          |
| cg24177983 | 1 | 37 | 11 | 2398403  | CD81                                | NM_004356                                        | TSS200 chr11:2398Island                  |
| cg24216966 | 1 | 37 | 6  | 31540121 | LTA;LTA;LTA                         | NM_000595;NM_001159740;NM_0005'UTR;5'UTR         |                                          |
| cg24243790 | 1 | 37 | 4  | 9760736  |                                     |                                                  |                                          |
| cg24285811 | 1 | 37 | 9  | 1.39E+08 |                                     |                                                  | chr9:13914Island                         |
| cg24300033 | 1 | 37 | 2  | 2.42E+08 |                                     |                                                  | chr2:24164N_Shore                        |

|            |   |   |    |    |                                                  |                                |                       |                   |
|------------|---|---|----|----|--------------------------------------------------|--------------------------------|-----------------------|-------------------|
| cg24330818 |   | 1 | 37 | 13 | 33002388 N4BP2L1;N4BP2L1                         | NM_052818;NM_001079691         | TSS200;TSS200         | chr13:3300S_Shore |
| cg24364491 | 2 |   | 37 | 6  | 32806906 TAP2;TAP2                               | NM_018833;NM_000544            | TSS1500;TSS1500       | chr6:32806S_Shore |
| cg24408706 |   | 2 | 37 | 11 | 363484                                           |                                |                       |                   |
| cg24453123 | 1 |   | 37 | 15 | 35374148                                         |                                |                       |                   |
| cg24453123 |   | 1 | 37 | 15 | 35374148                                         |                                |                       |                   |
| cg24533904 |   | 1 | 37 | 1  | 1.84E+08 C1orf21                                 | NM_030806                      | Body                  |                   |
| cg24541871 |   | 1 | 37 | 2  | 55845713 SMEK2;SMEK2                             | NM_001122964;NM_020463         | TSS1500;TSS1500       | chr2:55844S_Shore |
| cg24547359 |   | 1 | 37 | 1  | 53975500 GLIS1                                   | NM_147193                      | Body                  |                   |
| cg24550933 | 1 |   | 37 | 1  | 1.12E+08 LOC441897                               | NR_029429                      | TSS200                |                   |
| cg24563317 | 1 |   | 37 | 8  | 48872822 MCM4;MCM4;PRKDC;PRKDC                   | NM_005914;NM_182746;NM_006904; | TSS1500;TSS1500;TSS2  | chr8:48872Island  |
| cg24594224 |   | 1 | 37 | 6  | 33136015 COL11A2;COL11A2;COL11A2                 | NM_080679;NM_080681;NM_080680  | Body;Body;Body        |                   |
| cg24629356 |   | 1 | 37 | 1  | 35122551                                         |                                |                       |                   |
| cg24706188 |   | 1 | 37 | 8  | 55088456                                         |                                |                       |                   |
| cg24710435 |   | 1 | 37 | 10 | 14543847                                         |                                |                       |                   |
| cg24734300 | 1 |   | 37 | 7  | 35677335 HERPUD2                                 | NM_022373                      | Body                  |                   |
| cg24766104 | 1 |   | 37 | 19 | 16309072 AP1M1;AP1M1                             | NM_032493;NM_001130524         | Body;Body             | chr19:1630Island  |
| cg24766104 |   | 2 | 37 | 19 | 16309072 AP1M1;AP1M1                             | NM_032493;NM_001130524         | Body;Body             | chr19:1630Island  |
| cg24779831 | 1 |   | 37 | 2  | 2799370                                          |                                |                       |                   |
| cg24794433 | 1 |   | 37 | 9  | 1.24E+08 DAB2IP                                  | NM_032552                      | Body                  | chr9:12446Island  |
| cg24811352 |   | 1 | 37 | 5  | 1.41E+08 PCDHB6                                  | NM_018939                      | TSS1500               | chr5:14053N_Shore |
| cg24839562 | 1 |   | 37 | 6  | 31673423 LY6G6F                                  | NM_001003693                   | TSS1500               | chr6:31670S_Shelf |
| cg24856050 |   | 1 | 37 | 19 | 3192433 NCLN                                     | NM_020170                      | Body                  | chr19:3192Island  |
| cg24864663 | 1 |   | 37 | 15 | 43532243 TGM5;TGM5                               | NM_201631;NM_004245            | Body;Body             |                   |
| cg24891539 | 3 |   | 37 | 8  | 55370407 SOX17                                   | NM_022454                      | TSS200                | chr8:55370Island  |
| cg24891539 |   | 1 | 37 | 8  | 55370407 SOX17                                   | NM_022454                      | TSS200                | chr8:55370Island  |
| cg24917945 | 1 |   | 37 | 10 | 1.21E+08 C10orf46                                | NM_153810                      | TSS200                | chr10:1205Island  |
| cg24968786 |   | 1 | 37 | 11 | 66360800 CCDC87;CCS                              | NM_018219;NM_005125            | TSS1500;Body          | chr11:6636Island  |
| cg25013910 |   | 1 | 37 | 2  | 1478219 TPO;TPO;TPO;TPO                          | NM_175719;NM_000547;NM_175721; | Body;Body;Body;Body   | chr2:14807N_Shelf |
| cg25025455 | 1 |   | 37 | 3  | 1.34E+08 CEP63;CEP63;ANAPC13;CEP63;CEP63;ANAPC13 | NM_001042383;NM_001042400;NR_0 | 5'UTR;5'UTR;TSS200;5' | chr3:13420Island  |
| cg25092989 | 1 |   | 37 | 8  | 10932494 XKR6                                    | NM_173683                      | Body                  | chr8:10928S_Shelf |
| cg25100962 |   | 2 | 37 | 12 | 31782808                                         |                                |                       |                   |
| cg25124476 | 1 |   | 37 | 7  | 1.5E+08 TMEM176B;TMEM176B;TMEM176A;TMEM176B      | NM_001101312;NM_001101314;NM_C | TSS200;TSS200;TSS200  | chr7:15049Island  |
| cg25149069 |   | 2 | 37 | 1  | 2.33E+08 KIAA1804                                | NM_032435                      | 1stExon               | chr1:23346Island  |
| cg25154733 |   | 2 | 37 | 13 | 28965632 FLT1;FLT1;FLT1                          | NM_001159920;NM_001160030;NM_C | Body;Body;Body        |                   |
| cg25161386 |   | 1 | 37 | 17 | 27621177 NUFIP2                                  | NM_020772                      | TSS200                | chr17:2762Island  |
| cg25181381 | 1 |   | 37 | 11 | 1.34E+08                                         |                                |                       |                   |
| cg25193384 | 1 |   | 37 | 7  | 39837692                                         |                                |                       | chr7:39833S_Shelf |
| cg25194328 |   | 1 | 37 | 5  | 54472477                                         |                                |                       | chr5:54468S_Shelf |
| cg25206705 |   | 2 | 37 | 17 | 1082774 ABR;ABR                                  | NM_021962;NM_001159746         | Body;5'UTR            | chr17:1082Island  |
| cg25236028 |   | 1 | 37 | 17 | 767334 NXN                                       | NM_022463                      | Body                  |                   |
| cg25246158 |   | 1 | 37 | 19 | 1940184 CSNK1G2                                  | NM_001319                      | TSS1500               | chr19:1940N_Shore |
| cg25252926 |   | 1 | 37 | 21 | 43235862 PRDM15;PRDM15                           | NM_022115;NM_001040424         | Body;Body             | chr21:4323N_Shore |
| cg25328184 |   | 1 | 37 | 5  | 1.1E+08 TSLP                                     | NM_033035                      | TSS1500               | chr5:11040N_Shelf |
| cg25328184 |   | 1 | 37 | 5  | 1.1E+08 TSLP                                     | NM_033035                      | TSS1500               | chr5:11040N_Shelf |
| cg25334660 |   | 1 | 37 | 8  | 42270520                                         |                                |                       | chr8:42268S_Shore |
| cg25356214 | 2 |   | 37 | 12 | 51611871 POU6F1                                  | NR_026893                      | TSS1500               | chr12:5161S_Shore |
| cg25367905 |   | 1 | 37 | 5  | 1.77E+08 RGS14                                   | NM_006480                      | Body                  | chr5:17678S_Shore |
| cg25370231 |   | 1 | 37 | 10 | 13391182 SEPHS1                                  | NM_012247                      | TSS1500               |                   |
| cg25402787 |   | 1 | 37 | 15 | 53084679                                         |                                |                       | chr15:5308N_Shore |
| cg25409448 |   | 2 | 37 | 19 | 49558849 CGB7;CGB7                               | NM_033142;NM_033142            | 5'UTR;1stExon         | chr19:4955N_Shore |



|            |    |    |    |          |                                      |                                |                                  |                   |
|------------|----|----|----|----------|--------------------------------------|--------------------------------|----------------------------------|-------------------|
| cg25417551 | 1  | 37 | 17 | 35767582 | TADA2A;TADA2A;ACACA;TADA2A;ACACA;TAD | NM_001488;NM_133439;NM_198834; | 1stExon;1stExon;TSS15            | chr17:3576S_Shore |
| cg25427880 | 1  | 37 | 10 | 1.02E+08 |                                      |                                |                                  | chr10:1023Island  |
| cg25456593 | 1  | 37 | 11 | 70672858 | SHANK2                               | NM_012309                      | Body                             | chr11:7067Island  |
| cg25502179 | 1  | 37 | 3  | 46875342 | PRSS42                               | NM_182702                      | Body                             | chr3:46874Island  |
| cg25545088 | 1  | 37 | 6  | 43398446 | ABCC10                               | NM_033450                      | TSS1500                          | chr6:43395S_Shelf |
| cg25550629 | 1  | 37 | 12 | 53546895 |                                      |                                |                                  |                   |
| cg25714381 | 1  | 37 | 7  | 76751893 | CCDC146                              | NM_020879                      | TSS200                           | chr7:76750S_Shore |
| cg25734864 | 2  | 37 | 13 | 1.14E+08 | PROZ                                 | NM_003891                      | 1stExon                          |                   |
| cg25756867 | 1  | 37 | 3  | 1.8E+08  |                                      |                                |                                  |                   |
| cg25758828 | 1  | 37 | 2  | 1.14E+08 | PAX8;PAX8;PAX8;PAX8;PAX8;LOC440839   | NM_013953;NM_003466;NM_013952; | 3'UTR;Body;3'UTR;Body;3'UTR;Body |                   |
| cg25778535 | 1  | 37 | 11 | 8190572  | RIC3;RIC3;RIC3;RIC3                  | NM_001135109;NM_024557;NM_0011 | 1stExon;5'UTR;5'UTR;1            | chr11:8190Island  |
| cg25803630 | 2  | 37 | 8  | 29885309 |                                      |                                |                                  | chr8:29884Island  |
| cg25820279 | 1  | 37 | 2  | 1.77E+08 |                                      |                                |                                  | chr2:17700S_Shore |
| cg25824218 | 1  | 37 | 12 | 25104798 |                                      |                                |                                  | chr12:2510S_Shelf |
| cg25824218 | 1  | 37 | 12 | 25104798 |                                      |                                |                                  | chr12:2510S_Shelf |
| cg25859012 | 1  | 37 | 2  | 2.2E+08  | BCS1L;ZNF142;BCS1L                   | NM_004328;NM_001105537;NM_0011 | TSS200;TSS200;TSS200             | chr2:21952Island  |
| cg25884094 | 1  | 37 | 8  | 17785204 | PCM1                                 | NM_006197                      | 5'UTR                            | chr8:17780S_Shelf |
| cg25894839 | 1  | 37 | 1  | 1.62E+08 | FCRLB                                | NM_001002901                   | Body                             | chr1:16169Island  |
| cg25943588 | 1  | 37 | 11 | 14993913 | CALCA;CALCA;CALCA                    | NM_001033952;NM_001033953;NM_  | TSS200;TSS200;TSS200             | chr11:1499N_Shore |
| cg26003814 | 3  | 37 | 1  | 16444599 |                                      |                                |                                  |                   |
| cg26053864 | 1  | 37 | 15 | 35087635 | ACTC1                                | NM_005159                      | 5'UTR                            |                   |
| cg26074111 | 1  | 37 | 6  | 24776063 | GMNN                                 | NM_015895                      | 5'UTR                            | chr6:24775S_Shore |
| cg26084511 | 1  | 37 | 7  | 20818226 |                                      |                                |                                  | chr7:20817Island  |
| cg26091183 | 3  | 37 | 17 | 78387382 | LOC100294362                         | NR_029376                      | Body                             | chr17:7838N_Shore |
| cg26091183 | 2  | 37 | 17 | 78387382 | LOC100294362                         | NR_029376                      | Body                             | chr17:7838N_Shore |
| cg26105278 | 1  | 37 | 1  | 3624054  | TP73;TP73;TP73;TP73                  | NM_001126240;NM_005427;NM_0011 | Body;Body;Body;Body              | chr1:36233S_Shore |
| cg26114595 | 1  | 37 | 17 | 28395749 | EFCAB5;EFCAB5;EFCAB5                 | NR_026738;NM_198529;NM_0011450 | Body;Body;Body                   |                   |
| cg26129303 | 1  | 37 | 8  | 1.42E+08 |                                      |                                |                                  |                   |
| cg26148236 | 1  | 37 | 2  | 2.33E+08 | EFHD1;EFHD1                          | NM_025202;NR_027663            | TSS1500;Body                     | chr2:23349Island  |
| cg26149738 | 1  | 37 | 19 | 34287125 | KCTD15;KCTD15;KCTD15                 | NM_001129994;NM_024076;NM_0011 | TSS1500;TSS1500;TSS1             | chr19:3428Island  |
| cg26163463 | 1  | 37 | 5  | 1.4E+08  | EIF4EBP3;ANKHD1-EIF4EBP3             | NM_003732;NM_020690            | TSS1500;Body                     | chr5:13992N_Shore |
| cg26203055 | 2  | 37 | 18 | 19284713 | ABHD3;ABHD3                          | NM_138340;NM_138340            | 1stExon;5'UTR                    | chr18:1928Island  |
| cg26266950 | 2  | 37 | 7  | 19160621 |                                      |                                |                                  | chr7:19156S_Shelf |
| cg26384229 | 9  | 37 | 12 | 38710491 | ALG10B                               | NM_001013620                   | TSS200                           | chr12:3871Island  |
| cg26384229 | 14 | 37 | 12 | 38710491 | ALG10B                               | NM_001013620                   | TSS200                           | chr12:3871Island  |
| cg26490274 | 1  | 37 | 16 | 4385435  | GLIS2                                | NM_032575                      | Body                             |                   |
| cg26524638 | 1  | 37 | 11 | 2481449  | KCNQ1;KCNQ1                          | NM_181798;NM_000218            | TSS1500;Body                     |                   |
| cg26541533 | 1  | 37 | 6  | 1.64E+08 |                                      |                                |                                  | chr6:16425Island  |
| cg26573704 | 2  | 37 | 5  | 33892223 | ADAMTS12                             | NM_030955                      | TSS200                           | chr5:33892Island  |
| cg26575535 | 1  | 37 | 16 | 65157839 |                                      |                                |                                  | chr16:6515S_Shore |
| cg26586710 | 1  | 37 | 10 | 1.34E+08 | PWWP2B;PWWP2B                        | NM_001098637;NM_138499         | Body;Body                        | chr10:1342N_Shore |
| cg26588943 | 2  | 37 | 4  | 1.73E+08 | GALNTL6;GALNTL6                      | NM_001034845;NM_001034845      | 1stExon;5'UTR                    | chr4:17273Island  |
| cg26616283 | 1  | 37 | 7  | 11871535 | THSD7A                               | NM_015204                      | 1stExon                          |                   |
| cg26616283 | 1  | 37 | 7  | 11871535 | THSD7A                               | NM_015204                      | 1stExon                          |                   |
| cg26634911 | 2  | 37 | 4  | 47916863 | NFXL1                                | NM_152995                      | TSS1500                          | chr4:47915Island  |
| cg26651514 | 1  | 37 | 13 | 33864734 |                                      |                                |                                  |                   |
| cg26654519 | 1  | 37 | 8  | 1.43E+08 | FLJ43860                             | NM_207414                      | TSS200                           |                   |
| cg26712605 | 1  | 37 | 6  | 37745367 |                                      |                                |                                  |                   |
| cg26759552 | 2  | 37 | 7  | 1.4E+08  | LOC100134229;JHDM1D                  | NR_024451;NM_030647            | Body;TSS1500                     | chr7:13987Island  |
| cg26777456 | 1  | 37 | 12 | 54454250 | FLJ12825                             | NR_026655                      | Body                             | chr12:5445Island  |

|                |   |   |    |    |                            |                               |                    |                    |
|----------------|---|---|----|----|----------------------------|-------------------------------|--------------------|--------------------|
| cg26835440     | 2 |   | 37 | 8  | 55037773                   |                               |                    |                    |
| cg26919149     | 2 |   | 37 | 6  | 1.69E+08                   |                               |                    | chr6:1685C_Island  |
| cg26933136     |   | 1 | 37 | 1  | 28661842 MED18;MED18       | NM_001127350;NM_017638        | 3'UTR;3'UTR        |                    |
| cg26946235     | 2 |   | 37 | 10 | 1.35E+08                   |                               |                    | chr10:1348N_Shore  |
| cg26994413     | 1 |   | 37 | 12 | 1.31E+08 RIMBP2            | NM_015347                     | Body               | chr12:1309S_Shore  |
| cg27037109     |   | 1 | 37 | 19 | 12512034 ZNF799            | NM_001080821                  | TSS200             | chr19:1251_Island  |
| cg27042491     |   | 2 | 37 | 10 | 77191686                   |                               |                    | chr10:7719S_Shore  |
| cg27062060     |   | 1 | 37 | 17 | 79258687 SLC38A10;SLC38A10 | NM_001037984;NM_138570        | Body;Body          | chr17:7925N_Shore  |
| cg27072218     | 1 |   | 37 | 13 | 1.07E+08                   |                               |                    |                    |
| cg27101157     | 1 |   | 37 | 17 | 62340122 TEX2              | NM_018469                     | 5'UTR              | chr17:6233_Island  |
| cg27140170     |   | 1 | 37 | 2  | 2.31E+08 SP100;SP100       | NM_001080391;NM_003113        | TSS1500;TSS1500    |                    |
| cg27181253     |   | 2 | 37 | 1  | 1.13E+08 WNT2B;WNT2B;WNT2B | NM_004185;NM_024494;NM_024494 | Body;1stExon;5'UTR | chr1:11305_Island  |
| cg27207308     |   | 1 | 37 | 20 | 47935683                   |                               |                    | chr20:4793_Island  |
| cg27313674     |   | 1 | 37 | 20 | 6035120 LRRN4              | NM_152611                     | TSS1500            | chr20:6032S_Shore  |
| cg27323009     |   | 1 | 37 | 5  | 1.1E+08 TSLP;TSLP          | NM_138551;NM_033035           | TSS200;Body        | chr5:1104C_Island  |
| cg27343123     | 1 |   | 37 | 2  | 62423136 B3GNT2            | NM_006577                     | TSS200             | chr2:62422_Island  |
| cg27391127     | 1 |   | 37 | 10 | 1.04E+08 TRIM8             | NM_030912                     | Body               | chr10:1044N_Shore  |
| cg27426287     |   | 1 | 37 | 10 | 30025782 SVIL              | NM_003174                     | TSS1500            | chr10:3002_Island  |
| cg27445005     | 1 |   | 37 | 18 | 76190006                   |                               |                    | chr18:7618_Island  |
| cg27445005     |   | 2 | 37 | 18 | 76190006                   |                               |                    | chr18:7618_Island  |
| cg27553486     | 1 |   | 37 | 7  | 930964 C7orf20             | NM_015949                     | Body               | chr7:93091_Island  |
| cg27633010     | 1 |   | 37 | 10 | 1.35E+08 TUBGCP2           | NM_006659                     | Body               | chr10:135C_N_Shore |
| cg27633010     |   | 3 | 37 | 10 | 1.35E+08 TUBGCP2           | NM_006659                     | Body               | chr10:135C_N_Shore |
| cg27640020     | 1 |   | 37 | 19 | 19002253 GDF1;LASS1;LASS1  | NM_001492;NM_198207;NM_021267 | 5'UTR;Body;Body    | chr19:190C_N_Shelf |
| ch.16.1667936F |   | 1 | 36 | 16 | 73947777                   |                               |                    |                    |
| ch.2.3048096R  | 1 |   | 36 | 2  | 1.48E+08                   |                               |                    |                    |

## **Supplementary Document 1: Case and control eligibility and Selection Process**

### **1. Subject Inclusion:**

1.1. A subject with one or two knees with symptomatic OA that are eligible to be a Fast Progressor and/or a Non Progressor\*\*.

An eligible knee is defined as:

- 1.1a. Mild-moderate symptomatic OA at baseline: in the same knee, KLG 2-3 and frequent pain (pain on most days of a month in past year) at baseline.
- 1.1b. Medial compartment JSW  $\geq 1.5$ mm (V00MCMJSW  $\geq 1.5$ ) at baseline since at  $<1.5$ mm knee is already close to endstage and further fast progression is less unlikely to be preventable at that point; in addition JSW measurement is less reliable when knee approaches bone on bone.
- 1.1c. JSN in medial compartment at baseline is equal to or worse than JSN in lateral compartment
- 1.1d. JSW data at BL, 24m and 48m timepoints. (Exception: Fast Progressor knees can be missing JSW due to a TKR at 36 or 48m.)
- 1.1e. Adequate radiographic positioning at BL, 24 and 48m timepoints defined as VxxTPCFDS  $< 7.0$ mm and change in VxxTPCFDS  $< 2$ mm in magnitude BL to 24m or BL to 48m.

1.2. Subjects with only one eligible knee at baseline\*\*:

- 1.2a. The contralateral knee KLG is less than or equal to the eligible knee at baseline. (E.g. Subjects with a KLG 2 symptomatic eligible knee can have a KLG 0-2 symptomatic or nonsymptomatic. If the eligible knee is KLG 3, then the contralateral knee can be a KLG 0-3 symptomatic or nonsymptomatic knee. The contralateral knee must have a baseline medial JSW of  $\geq 1.5$ mm.

### **2. Subject Exclusion**

2.1 TKR in either knee at BL, 12m or 24m.

2.2 RA diagnosis at any visit thru 72m (RAVISIT is 0,1,2,5,6 or 8). What about subjects with self-reported psoriatic arthritis, AS, or reactive arthritis? How many are there?

2.3 Oral Glucocorticoid use reported at  $\geq 2$  visits from BL to 72m. How many are there?

### **3. Classify eligible knees of eligible subjects as Fast Progressor or Non-Progressor Index knees**

3.1 Fast Progressor Index knees: JSW loss of more than 0.7mm between BL and 24m and remains narrowed more than 0.7mm at 48m or has a TKR by 48m.

3.2 Non-Progressor Index knees: JSW loss less than 0.5mm between BL and 24m and remains narrowed less than 0.5mm at 48m. Knee does not have TKR at 36m or 48m and does not have lateral JSN progression through 48m.

### **4. Fast Progressor Subjects**

A Fast Progressor subject has one or two Fast Progressor Index knees.

For those with one Fast Progressor Index knee the contralateral knee can be:

- 4.1 A Non Progressor Index knee with a KLG  $\leq$  to the KLG of the progressor knee;
- 4.2 An ineligible knee (e.g. KLG 0-1, KLG 2-3 nonsymptomatic and KLG  $\leq$  to the KLG of Progressor knee) that meets Fast Progressor JSW criteria;
- 4.3 An ineligible knee that does not meet Fast Progressor criteria and KLG  $\leq$  to the KLG of Progressor knee; or
- 4.4 An ineligible knee that does not meet conditions 1.1b to 1.1e and KLG  $\leq$  to the KLG of Progressor knee.

### **5. Non Progressor Subjects**

A Non Progressor Subject has one or two Non Progressor Index knees.

If a subject has only one Non Progressor Index knee:

5.1. The contralateral knee cannot be a Fast Progressor Index knee;

5.2. If the contralateral knee is not an eligible knee, then the contralateral knee must a) have  $KLG \leq$  to the KLG of Progressor knee, b) allow assessment for Fast Progression (meet conditions 1.1b. to 1.1e.) and c) have JSW loss less than 0.5mm between BL and 24m and remain narrowed less than 0.5mm at 48m, d) does not have lateral JSN progression by 48m and e) does not have TKR at 36m or 48m.
